# Supplementary material for: A phylogenetic approach to study the origin and evolution of the CRINKLY4 family
Source: Front Plant Sci. 2015 Oct 23;6:880. doi: 10.3389/fpls.2015.00880 (PMC4617170; doi:10.3389/fpls.2015.00880)
Supplement: Supplementary file 3 [file Table2.XLSX]

## Sheet: Putative CR4 family members
Supplementary Table 2. Set of putative CR4 family members. Table contains information on protein accession numbers, names, sizes and sequences together with BLASTP and reciprocal BLASTP criteria such asscores, query cover, e-value etc.
Accession	Name	Size, aa	Sequence	Latin name	Max score	Total score	Query cover, %	Ident, %	E-value	Result after reciprocal BLASTP search	E-value (reciprocal BLASTP)
Q9LX29	ACR4L_ARATH| Serine/threonine-protein kinase-like protein ACR4	895	MRMFETRAREWILLVKLVLFTSIWQLASALGSMSSIAISYGEGGSVFCGLKSDGSHLVVCYGSNSAILYGTPGHLQFIGLTGGDGFMCGLLMLSHQPYCWGNSAFIQMGVPQPMTKGAEYLEVSAGDYHLCGLRKPIVGRRKNSNIISSSLVDCWGYNMTRNFVFDKQLHSLSAGSEFNCALSSKDKSVFCWGDENSSQVISLIPKEKKFQKIAAGGYHVCGILDGLESRVLCWGKSLEFEEEVTGTSTEEKILDLPPKEPLLAVVGGKFYACGIKRYDHSAVCWGFFVNRSTPAPTGIGFYDLAAGNYFTCGVLTGTSMSPVCWGLGFPASIPLAVSPGLCIDTPCPPGTHELSNQENSPCKFTGSHICLPCSTSCPPGMYQKSVCTERSDQVCVYNC…	Arabidopsis thaliana	-	-	-	-	0	CR4	0
XP_004152097.1	PREDICTED: serine/threonine-protein kinase-like protein ACR4-like	921	MGLFLLVDLVVSFLKKMCGWRGGLFVELVVFADMCLLVSGLGSMSPLAVSYGEKGPVFCGLKSDGSHLVNCFGSNSAITYGTPSHFPFIGLTAGDGFVCGLLLDSNQPYCWGSSGYVQMGVPQPMIKGAQYLEISAGDYHLCGLRTPLTGRRRNMSFVDCWGYNMTRTFAFDGPIESISAGSEFNCGLFSLNRTVFCWGDETSSRVISLIPKDMRFQKIASGGYHVCGILEGANSRAFCWGRSLDIEEEISVAYSGEGNVELVPVDPLASVVGGKFHACGIKSSDRGVICWGFTVKPSTPPPDGIKVYDIAAGDYFTCGILAEKSLLPVCWGLGYPTSLPLAVSPGICKATPCPPGFYEISQDKARCKSPNFHVCMPCSSACPPDMYLKVECSLKSDRQ…	Cucumis sativus	1280	1280	98	70	0	CR4	0
K7LPG1	Uncharacterized protein	816	MGSNQPYCWGSSSYIEMGVPQPMIKGAQYLEISAGDYHVCGLRKPMTGRHRNVSLVDCWGYNMTKNYVVGGMIQSISAGSEFNCGLFSQNRTAFCWGDETNSLVISLIPHDMRFRKISAGGYHVCGISEGVNSKTFCWGRSLNLEEEISVSHAGQGNVDLAPNDPMLSLVGGKFHACGIKSYDRGVICWGFIIKPSSPSPKGIKVFEVAAGDYFTCAVLADKSLMPLCWGVGFPTSLPLAVSPGMCQPSPCAPGSYAIDKHKSLCKSPDSRVCMRCSGACPPEMYLKSACNLAYDRVCEYNCSSCSSSECFLNCSSSYSNAAASTEKKSEKIWALQLPVLIAEIAFAVFVVSIMSITTVLYVRYRLRDCECSKGSGVKKLGGNSSFQNENKVRPDLEEL…	Glycine max	1097	1172	94	67	0	CR4	0
K7M991	Uncharacterized protein	859	MHKKVYVKRYSNIAAATVHAIIYGTPTHFPFLGLTAGDGFVCGLLMSSNQPYCWGSSGHVEMGVPQPMVKGAQYLEISAGDYHVCGLRKPLTGRHRNTSLVDCWGYNMTNNYVFDGQVQSISAGSQFNCGLFSQNRTVFCWGDETSSQVIYMIPQGIRFQKISAGGYHVCGILEGVNSRAVCWGRSMLDLGEELSISLTRSGQGNVELAPNDPMLSVVGGKFHACGIRSHDRGVVCWGYSFKAGTPVPSGIKAFEIGAGNYFTCGILVEKSLMPVCWGVGFPTSLPLPVSPRMCRSAPCAPGYYETQQNGLCKSPDSHICMPCSAACPPEMYQRSGCNLKSDILCEYNCSLCSSPECLSNCSSSYSNAASGKRSERFWSMQLPVLIAEIAFAVFLVSIV…	Glycine max	1140	1210	95	67	0	CR4	0
XP_003540697.2	PREDICTED: serine/threonine-protein kinase-like protein ACR4-like	946	MSKQFCYYYWSIFYILHFFLCVIFWLLCIMGFSLKHRLIYGFNVNQCSTRLLFELVILSHLWLQVTSLGSMSSIAISYGEKGSVFCGLKSDGSHTVTCYGSNSAIIYGTPTHFSFLGLTAGDGFVCGLLMGSNQPYCWGSSAYIEMGVPQPMIKGAQYLEISAGDYHVCGLRKPMTGRHRNISLVDCWGYNMTKNYVFGAQIQSISAGSEFNCGLFSQNRTVFCWGDETNSLVISLIPHDMRFHKISAGGYHVCGISEGVSSKTFCWGRSLNLEEEISVSHAGQGNVDLAPNDPMLSVVGGKFHACGIKSYDRGVICWGFIIKPSTPSPKGIKVFEVAAGDYFTCAVLAVKSLMPSCWGVDFPTSLPLAVSPGMCQPAPCAPGSYAIDQHKSLCKSPDS…	Glycine max	1228	1228	98	69	0	CR4	0
XP_003542059.1	PREDICTED: serine/threonine-protein kinase-like protein ACR4-like	900	MNLWPVLFGTLFEVVVFSCLWLQISSLGSMSSIAVSYGDKGSVFCGLKSDGSHTVTCYGIDSAIIYGTPTHFPFLGLTAGDGFVCGLLMSSNQPYCWGSSGHVEMGVPQPMVKGAQYLEISAGDYHVCGLRKPLTGRHRNTSLVDCWGYNMTNNYVFDGQVQSISAGSQFNCGLFSQNRTVFCWGDETSSQVISMIPQGMRFQKISAGGYHVCGILEGVNSRAVCWGRSLLDLREELSISLTGSGQGQGNVELAPIDPMLSVVGGKFHACGIRSYDRGVVCWGYSFKAGTPVPSGIKAFEIGAGNYFTCGVLVEKSLMPVCWGVGFPTSLPLPVSPRMCRSTPCSPGYYETQQNGLCKSPDSHICMPCSAACPPEMYQRSGCNLKSDILCEYNCSICSS…	Glycine max	1221	1221	98	67	0	CR4	0
XP_003546987.1	PREDICTED: serine/threonine-protein kinase-like protein ACR4-like, partial	857	WLESDGSHTVTCYGINSAIIYGTPTHFPFLGLTAGDGFVCGLLMSSNQPYCWGSSGHVEMGVPQPMVKGAQYLEISAGDYHVCGLRKPLTGRHRNTSLVDCWGYNMTNNYVFDGQVQSISAGSQFNCGLFSQNRTVFCWGDETSSQVIYMIPQGIRFQKISAGGYHVCGILEGVNSRAVCWGRSMLDLGEELSISLTRSGQGNVELAPNDPMLSVVGGKFHACGIRSHDRGVVCWGYSFKAGTPVPSGIKAFEIGAGNYFTCGILVEKSLMPVCWGVGFPTSLPLPVSPRMCRSAPCAPGYYETQQNGLCKSPDSHICMPCSAACPPEMYQRSGCNLKSDILCEYNCSLCSSPECLSNCSSSYSNAASGKRSERFWSMQLPVLIAEIAFAVFLVSIVSI…	Glycine max	1162	1183	95	67	0	CR4	0
ABW81401.1	receptor-like kinase CR4	897	MGSVLALSLCCLTLLPSWAYGLGSMGSISVSYGEDGPVFCGLSSDGSHLVACSGADASVVYGAPLRIPFLGLTAGDGFACGLLLDTSQPYCWGSNSYVKIGVPQPMVEGVEYSMLSAGDNHLCALRMPDKGIPHGDTSVIDCWGYNMTATHVVAGAVSTRSAGSVFNCALFSRNRTVFCWGDETVSGVIGLAPRNVKFQSIGAGGYHVCGVLENAQVFCWGRSLEMQQVSPTGAIGEGDVSIVPMDAMVSVVGGRFHACGIRSLDHQVACWGFQLQNSTSAPKGLRLYAIVAGDYFTCGVPAETSMKPRCWGNSGPLALPMAVSPGICVSAACSPGYYEYVNHGELGGSKACKPGNSRLCLPCSAACPDNSYESSPCNVTADRVCQFDCSRCVSDECWS…	Hordeum vulgare subsp. vulgare	1102	1102	98	60	0	CR4	0
BAK05611.1	predicted protein	897	MGSVLALSLCCLTLLPSWAYGLGSMGSISVSYGEDGPVFCGLSSDGSHLVACSGADASVVYGAPLRIPFLGLTAGDGFACGLLLDTSQPYCWGSNSYVKIGVPQPMVEGVEYSMLSAGDNHLCALRMPDKGIPHGDTSVIDCWGYNMTATHVVAGAVSTISAGSVFNCALFSRNRTVFCWGDETVSGVIGLAPRNVKFQSIGAGGYHVCGVLENAQVFCWGRSLEMQQVSPTGAIGEGDVSIVPMDAMVSVVGGRFHACGIRSLDHQVACWGFQLQNSTSAPKGLRLYAIVAGDYFTCGVPAETSMKPRCWGNSGPLALPMAVSPGICVSAACSPGYYEYVNHGELGGSKACKPGNSRLCLPCSAACPDNSYESSPCNVTADRVCQFDCSRCVSDECWS…	Hordeum vulgare subsp. vulgare	1103	1103	98	60	0	CR4	0
XP_003597519.1	Serine/threonine protein kinase-like protein ACR4	921	MGFSRKQFSTYLLNTILFEVVVFSWLWSKVTGLGSMSSIAVSYGDKGSAFCGLKSDGSHTVTCYGMNSAIVYGTPSQFPFLGLTSGDGFVCGLLMSSNQPYCWGSSSHIEMGVPQPMFKDAQYLEISAGDYHVCGLRKPLTGRHRNFSFVDCWGYNMTKNYVFDGQIQSISAGSEFNCGLFSQNRTVFCWGNEVSTQVIRLIPQRMRFQKVSCGGYHVCGILEGVNSRTVCWGRSLGLEQEISLIPNQGQGGNVELAPNDPMLSVVGGKFHACGIKSYDHVVICWGLNLKTSTKVPKGIKVFDIAAGDYFTCGILAAKSLESICWGVGFPTSLPLAVSPRTRKCLSAPCPPSYYEIEKDQQNGLICQDPNSHLCVPCSGVCPDEMYQKSGCNLKSDILC…	Medicago truncatula	1216	1216	98	67	0	CR4	0
EEC75803.1	hypothetical protein OsI_12742	858	MASIAVSYGEDGPVFCGLNSDGSHLVTCFGADASVVYGAPSRIPFVGVTAGDGFACGLLLDTNQPYCWGSNSYVKIGVPQPMVEGAMYSELSAGDNHLCALRTSVKGFHSVNGDTSVIDCWGYNMTATHTVTGAVSAISAGSVFNCGLFARNRTVFCWGDESVSGVIGLAPRNVRFQSIGAGGYHVCGVLENAQVFCWGRSLEMQQMSTPSSTDDGDVNIVPMDAMVSVVGGRFHACGIRSLDHQVACWGFTLQNSTLAPKGLRVYAIVAGDYFTCGVPAETSLKPMCWGHSGPLALPMAVSPGICVSDSCSHGYYEYANHGEVGSGSKTCKPANSRLCLPCSVGCPDDSYESSPCNATADRVCQFDCSKCASDECVSFCLSQKRTKNRKFMAFQLRIF…	Oryza sativa Indica Group	1058	1058	96	60	0	CR4	0
EEE59556.1	hypothetical protein OsJ_11840	1103	MDIVPVVALCCCLVLLPSWAYGLGSMASIAVSYGEDGPVFCGLNSDGSHLVTCFGADASVVYGAPSRIPFVGVTAGDGFACGLLLDTNQPYCWGSNSYVKIGVPQPMVEGAMYSELSAGDNHLCALRTSVKGFHSVNGDTSVIDCWGYNMTATHTVTGAVSAISAGSVFNCGLFARNRTVFCWGDESVSGVIGLAPRNVRFQSIGAGGYHVCGVLENAQVFCWGRSLEMQQMSTPSSTDDGDVNIVPMDAMVSVVGGRFHACGIRSLDHQVACWGFTLQNSTLAPKGLRVYAIVAGDYFTCGVPAETSLKPMCWGHSGPLALPMAVSPGICVSDSCSHGYYEYANHGEVGSGSKTCKPANSRLCLPCSVGCPDDSYESSPCNATADRVCQFDCSKCASD…	Oryza sativa Japonica Group	643	1246	98	52	0	CR4	0
NP_001050726.1	Os03g0637800	901	MDIVPVVALCCCLVLLPSWAYGLGSMASIAVSYGEDGPVFCGLNSDGSHLVTCFGADASVVYGAPSRIPFVGVTAGDGFACGLLLDTNQPYCWGSNSYVKIGVPQPMVEGAMYSELSAGDNHLCALRTSVKGFHSVNGDTSVIDCWGYNMTATHTVTGAVSAISAGSVFNCGLFARNRTVFCWGDESVSGVIGLAPRNVRFQSIGAGGYHVCGVLENAQVFCWGRSLEMQQMSTPSSTDDGDVNIVPMDAMVSVVGGRFHACGIRSLDHQVACWGFTLQNSTLAPKGLRVYAIVAGDYFTCGVPAETSLKPMCWGHSGPLALPMAVSPGICVSDSCSHGYYEYANHGEVGSGSKTCKPANSRLCLPCSVGCPDDSYESSPCNATADRVCQFDCSKCASD…	Oryza sativa Japonica Group	1095	1095	98	61	0	CR4	0
XP_001754560.1	predicted protein	893	MPVLVRPWRAVKALLLVVVAASLLRIGDALGSMNSVAVSYGGNGQTLCSLRADKANVVSCFGSDVASVYGAPPRLPLVGLTGGDGFVCGLSMGSRQPYCWGNNIYVEAGVPAVGDRHYAALSAGDNHLCALRQSASYVAGGPAVDCWGYNMTGSFINAPLLSITSGSFFSCGLFAANFTPVCWGDETGSGVISTAPKGLEFNSITAGGYHVCGILQNGQRTFCWGRSLALQDGVPKGAIFTSLVAGKFSTCGLHKDTHLPLCWGFTLPNNRAMPTNVPFSALVAGDYFVCGLPLTPSLPQQCWGSGYPVTLPTGIAPGMCSSLPCMSGTYSLSAEVVKALAASGATLCPNPTDNLCINCSKGCPSGMIESVECTSTADRQCSYDCSHCNHNATCSAACY…	Physcomitrella patens	785	785	98	48	0	CR4	0
U5FMT4	Epidermal differentiation family protein	922	MGNWSHSVGDFLIRVLMTSKWNCGFVVQFVVLSDLWWLVSGLGSMSSIAISYGEKGPAFCGIKSDGSHLVNCYGSNSAIIHETPAYFHFIGLTAGDGFVCGLLLESNRPYCWGSSGYLRPGVPQPMMEEAEYVEISAGDYHLCGLRKPLTGRRRNLSLIDCWGYNMTRNHVFEGQIQSISAGSDFNCGLFSENRTVFCWGDQASSRVISLVPQEMRFQKIAAGGYHVCGILEGVNSRAFCWGRSLDLEEEISVISAAYVNQGNVDLPPSDPMLSVVGGKFHACGIKSYNREVICWGYIVKPSTPTPTGIKVYEIAAGNYFTCGILAEKSLVPVCWGLGFPSSLPLAVSPGLCKTTPCPPGSYEFVGASTPCTSPGSRACLSCSNGCPAEMYQKTKCTSK…	Populus trichocarpa	1291	1291	100	69	0	CR4	0
XP_002309807.2	epidermal differentiation family protein	906	MIGKWNGGYLVHFVVLSDLWWLVSGLGSMSSIAISYGENGPVFCGLKSDGSHLVNCYGSNSAIIYGTPAHFHFIGLTAGDGFVCGLLLESNQPYCWGSSGYLRPGVPRPMMEEAEYVEISAGDYHLCGLRKPSTGRSRNLSLIDCWGYNMTRNHVFDGQIQSISAGSEFNCGLFSENRTVFCWGDEANSRVISLIPQEMRFQKIAAGGYHVCGILEGVNSRAFCWGRSLGLEEEISVISAAYLNQGNVDFPPSDPMLSVVGGKFHACGIKSYDREVICWGYIVKRSTPTPSAIKVYEIAAGNYFTCGILAEKSLLPVCWGLEFPSSLPLAVSPGLCETTPCPPGSYEFFDANPPCKSPDSHACLPCSNGCPAEMYQKMECTLKSDRQCDYNCSSCYSAE…	Populus trichocarpa	1277	1277	98	70	0	CR4	0
M1A8J1	Uncharacterized protein	660	MNLEEEFSVAQLNVELAAPSDPIISVVGGKFHACGIRSYDRHVVCWGYRVEKSTPPPSGVRLYEIAAGDYFTCGILAEISLLPVCWGFGFPSSLPLAVSPGVCKPRPCASGFYEFNNGSATCKSPDSRICLPCTNGCPAEMYQQVQCTSSTDSQCTYNCSSCTSVDCLNSCSTAISGKKNAKFWSLQLPVIVAEVAFAVFLVSVVSLTSIVYVRYKLRNCRCSGKGPSPRKNGTFPKEIAKDRADLDDLKIRRAQMFTYEDLERATEGFKEESQVGKGSFSCVFKGVLKDGTVVAVKRAIMSSDMKKNSKEFHNELDLLSRLNHAHLLNLLGYCEEGGERLLVYEYMANGSLHEHLHGKKKEQLDWIRRVTIAVQAARGIEYLHGYACPPVIHRDIKSS…	Solanum tuberosum	901	1014	90	69	0	CR4	0
M1A8J2	Uncharacterized protein	860	MSSIAISYGEYGSVFCGLKSDGSHLVSCYGSTSSIIYSTPAHFPFIGLTAGNGFVCGLLMDSYQPYCWGKSNFVQMGVPQPMIKGSQYLEISAGENHLCGLRQPLMGKHRNTSLVDCWGYNMTTNNEFEGQIHSISAGSEFNCALFSVNKSVLCWGDETSSQVITLAPKDLRFIKIAAGGYHVCGILEGVNSQVYCWGRSMNLEEEFSVAQLNVELAAPSDPIISVVGGKFHACGIRSYDRHVVCWGYRVEKSTPPPSGVRLYEIAAGDYFTCGILAEISLLPVCWGFGFPSSLPLAVSPGVCKPRPCASGFYEFNNGSATCKSPDSRICLPCTNGCPAEMYQQVQCTSSTDSQCTYNCSSCTSVDCLNSCSTAISGKKNAKFWSLQLPVIVAEVAFAV…	Solanum tuberosum	1212	1253	97	69	0	CR4	0
XP_006352076.1	PREDICTED: serine/threonine-protein kinase-like protein ACR4-like	895	MDVFNKWCVVMWKCRYFVRAFMLLVVFSKVSGFGSMSSIAISYGEYGSVFCGLKSDGSHLVSCYGSTSSIIYSTPAHFPFIGLTAGNGFVCGLLMDSYQPYCWGKSNFVQMGVPQPMIKGSQYLEISAGENHLCGLRQPLMGKHRNTSLVDCWGYNMTTNNEFEGQIHSISAGSEFNCALFSVNKSVLCWGDETSSQVITLAPKDLRFIKIAAGGYHVCGILEGVNSQVYCWGRSMNLEEEFSVAQLNVELAAPSDPIISVVGGKFHACGIRSYDRHVVCWGYRVEKSTPPPSGVRLYEIAAGDYFTCGILAEISLLPVCWGFGFPSSLPLAVSPGVCKPRPCASGFYEFNNGSATCKSPDSRICLPCTNGCPAEMYQQVQCTSSTDSQCTYNCSSCTS…	Solanum tuberosum	1220	1220	98	68	0	CR4	0
C5YRT4	Putative uncharacterized protein Sb08g003290	903	MDHVPALVLAAVCFLALLPGWASGLGSMSSIAVSYGEDGPVFCGLNSDGSHLVACFGADASVLYGAPPNIPFLGLTAGDGFVCGLLLDTRQPYCWGSNSYVKSGVPQPMVEGARYSELSAGDNHLCALRVAEDGGRGSSAASAKALIDCWGYNMTATHVVDEAVSTVSAGSVFNCGLFARNRTVFCWGDETVSGVVGLAPRNVRFQSIGAGGYHVCGVLENAQVFCWGRSLEMQQVAPSSAIGVGDVNIVPMDAMVAVVGGRFHACGIRSLDHQVACWGFTLHNSTSPPKGLKMYALVAGDYFTCGVPAETSLMPRCWGNSGPLALPMAVPPGICVPTACSHGYYEYVNHGEVGSIKVCKPANSRLCLPCSTGCPEDSYESSPCNATADHVCQFDCSRC…	Sorghum bicolor	1083	1083	98	60	0	CR4	0
W5HB53	Uncharacterized protein	672	MQQVSPTGAIGEGDVSIVPMDAMVSVVGGRFHACGIRSLDHQVACWGFQLQNSTSAPKGLRLYTIVAGDYFTCGVPAETSMKPRCWGNSGPLALPMAVSPGICVSSACSPGYYEYVNHGELGGSKSCKPGNSRLCLPCSAGCPDNSYESSPCNATADRVCQFDCSRCVSDECLSYCTSRKQTNNHKSMDFQMRIFVAEIAFAVILIFTVTAISCLYVRHKLRDCRCSKSKLRMTKSATYSFRKDNTKIQPDVEDLKIRRAQEFSYEELEQATDGFSEDSQVGKGSFSCVFRGILRDGTVVAVKRAIKVSDAKKSSKEFHTELDLLSRLNHAHLLDLLGYCEDGSERLLVYEFMAHGSLYQHLHGKDSNLKKQLNWTRRVTIAVQAARGIEYLHGYACPP…	Triticum aestivum	850	997	93	63	0	CR4	0
W5HXN8	Uncharacterized protein	900	MDSVPALALCCLILLPSWANGLGSMGSISVSYGEDGPVFCGLSSDGSHLVTCSGADASVVYGAPLRIPFLGLTAGDGFACGLLLDTSQPYCWGSNSYVKIGVPQPMVEGVEYSMLSAGDNHLCALRTPDKGIPRGVNPDTSVIDCWGYNMTATHVVAGAVSTISAGSVFNCALFARNRTVFCWGDETVSGVIGLAPRNVKFQSIGAGGYHVCGVLENAQVFCWGRSLEMQQVSPTGAIGEGDVSIVPMDAMVSVVGGRFHACGIRSLDHQVACWGFQLQNSTSAPKGLRLYTIVAGDYFTCGVPAETSMKPRCWGNSGPLALPMAVSPGICVSSACSPGYYEYVNHGELGSSKSCKPGNSRLCLPCSAGCPDNSYESSPCNATADRVCQFDCLRCVSDE…	Triticum aestivum	1102	1102	97	60	0	CR4	0
CBI36662.3	unnamed protein product	739	MGISRSLLEHFLNWVLKIQTWQAVFLVQIRVLVVFSNLWWLVSGLGSMSSIAISYGENGPVFCGLKSDGSHLVTCYGSNSAIIYGTPAHFPFMGLTAGDGFVCGLLVDSNQPYCWGSSRYVQMGVPQPMIKGAEYLEISAGDYHLCGLREPLTGRLRNYSLVDCWGYNMTRSYRFDGQLQSISAGSEFNCGLFSQNRTVFCWGDETSSRVTSLIPQEMRFQKIAAGGYHVCGILEGANSRVFCWGGRSLDIEEEISTAYTGQGNVDSAPKDPMLSVVGGKFHACGIRSSDRGVTCWGFRVKTSTLPPDGIKVYEIAAGNYFTCGILAEKSLLPVCWGLGFPSSLPLAVSPGLCTPSPCLPGFYEFNHESPPCKSLNSHVCLPCSSACLDDMYQKAECTL…	Vitis vinifera	692	951	81	62	0	CR4	0
F6HYS0	Putative uncharacterized protein	879	MSSIAISYGENGPVFCGLKSDGSHLVTCYGSNSAIIYGTPAHFPFMGLTAGDGFVCGLLVDSNQPYCWGSSRYVQMGVPQPMIKGAEYLEISAGDYHLCGLREPLTGRLRNYSLVDCWGYNMTRSYRFDGQLQSISAGSEFNCGLFSQNRTVFCWGDETSSRVTSLIPQEMRFQKIAAGGYHVCGILEGANSRVFCWGGRSLDIEEEISTAYTGQGNVDSAPKDPMLSVVGGKFHACGIRSSDRGVTCWGFRVKTSTLPPDGIKVYEIAAGNYFTCGILAEKSLLPVCWGLGFPSSLPLAVSPGLCTPSPCLPGFYEFNHESPPCKSLNSHVCLPCSSACLDDMYQKAECTLKSDRQCEFNCSGCYSAECFSNCSSSSYANAITGRKTERFWSLQLPVV…	Vitis vinifera	1250	1250	96	71	0	CR4	0
XP_002264936.1	PREDICTED: serine/threonine-protein kinase-like protein ACR4	926	MGISRSLLEHFLNWVLKIQTWQAVFLVQIRVLVVFSNLWWLVSGLGSMSSIAISYGENGPVFCGLKSDGSHLVTCYGSNSAIIYGTPAHFPFMGLTAGDGFVCGLLVDSNQPYCWGSSRYVQMGVPQPMIKGAEYLEISAGDYHLCGLREPLTGRLRNYSLVDCWGYNMTRSYRFDGQLQSISAGSEFNCGLFSQNRTVFCWGDETSSRVTSLIPQEMRFQKIAAGGYHVCGILEGANSRVFCWGGRSLDIEEEISTAYTGQGNVDSAPKDPMLSVVGGKFHACGIRSSDRGVTCWGFRVKTSTLPPDGIKVYEIAAGNYFTCGILAEKSLLPVCWGLGFPSSLPLAVSPGLCTPSPCLPGFYEFNHESPPCKSLNSHVCLPCSSACLDDMYQKAECTL…	Vitis vinifera	1268	1268	98	71	0	CR4	0
NP_001105395.1	putative receptor protein kinase CRINKLY4 precursor	901	MDHVPALVLAGCCFLALLPGWACGLGSMSSIAVSYGEDGPVFCGLNSDGSHLVACFGADASVLYGAPPNIPFLGLTAGDGFVCGLLLDTRQPYCWGSNSYVKSGVPQPMVEGARYSELSAGDNHLCALRAAQDGGRGSSAATSLIDCWGYNMTATHAVDEAVSTVSAGSVFNCGLFARNRTVFCWGDETVSGVVGLAPRDLHFQSIGAGGYHVCGVLENAQVFCWGRSLEMQQVVPSSAIGDGDVNIVPMDAMSTVVGGRFHACGIRSLDHQVACWGFTLHNSTSPPKGLKMYALVAGDYFTCGVPAETSLMPRCWGNSGPLALPMAVPPGICVPTACSHGYYEYVNHGEVGSIKVCKPANSRLCLPCSTGCPEGLYESSPCNATADRVCQFDCLKCVT…	Zea mays	1066	1066	97	61	0	CR4	0
XP_002976502.1	hypothetical protein SELMODRAFT_443219	515	MLRCSSKPLEICGSFLALALLLGLGIDTVLALGAMTTLAAMRGSFTDAKNSFALCVLRAGTMQPFCWGTFVIDSNISPPGNSLLWAMNGGAYFACGLRADSRSPLCWGQSPGSDVPDEFKNVSYAEISCGGWHACAVRSNSSSTAPGQIDCWGASDFGQISRPDRPSQMVSITAGDYFSCALVASTRRPRCWGKISKSGNTTEVIPHDSVFFRIFAGRTHVCGILLASREALCWGNNESGQCDPPKGLSFATLAAGIDHSCGIRDDSHEVVCWGDNRHGQLEVPSDLKFSTIAAGDFYTCGVTLGERQLLCWGSARAPKTIRVKDGLCVADCEHDQYDLMNTDVKDCAGPEEKICLPCARCKAGSYETSPCVPFSDRSCSSCKWCFSREKRDHPCRRTC…	Selaginella moellendorffi	158	158	48	30	3e-45	CR4	2e-36
XP_002960988.1	hypothetical protein SELMODRAFT_402524	462	MDLDGSNRLLRLIAIFLSIVSAAHAFGYMSTMAALWGSGSSPVKSFSVCGIDASSGNPRCWGTFAINNASIPPANISLWSLTGGAYFACGLTLDGHNPVCWGQTPGSIVPAAFQGVRYSTINCGGWHVCAIRDKSILPGDEGRVDCWGNNDFGQCSPPITIPMRSITAGDYFSCGLTQYTGRVVCWGQMSGDHNDSAQRNRFNQRSLFDTIAAGRTHVCGILRKDHRALCWGANDHGQCSPPEGVAFSAISAGMFHTCGIRLDNHSAQCWGDDSVGQSSAPAGVAFSLITAGDRYTCGVRLDRDDHGGVECWGNQVAAPPDLGFNASQGVCVESSSCRSTQFELAPLVVVAGDNLTETAATTGCKICSPCATCGDGFYEAAACGQSRDTECSSCAACRF…	Selaginella moellendorffii	157	157	44	31	4e-45	CR4	3e-37
XP_002965187.1	hypothetical protein SELMODRAFT_406397	547	MWSGSADPSIPIPGTFALCALHATDLRVRCMGIHHNGSNPPDTTQFLALSGGGHFACGVEYGSHFIVCWGELQVPQDLQQVSYSIVASGGFHVCALRSDNSFVDCWGRIPAPPAGMAFASLVSGWGFSCGLTQAGTAVCWGDLRKEILQPSNETFGSIFAGGNTACGVTLLGRLCCWGTADHGQSTPPTGLQFLSIAGGLYHTCGIRADNRQVLCWGDQDNGKLTAPLDVSFSQIAAGDFYTCGMRMDPPMDVVCWGNSVWYPRYQKNFTISRGMCVSECGRSQFQAADQLCPVVRDKVCLDCSVCVGNSEASPCGPLSDRKCDTRSRPRSTALVILLIAAALFLGSLLVLATWLYLLRREKSKEDDPKQQGDGKLEVVASKNENERSAGQALAMSALE…	Selaginella moellendorffii	157	335	69	29	1e-44	CR4	5e-34
XP_002973405.1	hypothetical protein SELMODRAFT_413732	465	MLRCSSRPLEICGSLLALALLLGLGIDTALALGAMTTLAAMRGSFTDAKNSFALCVLRAGTMQPFCWGTFVIDSNISPPGNSLIWAMNGGAYFACGLRADSRSPLCWGQSPGSDVPDEFKNVSYAEISCGGWHACAVRSNSSSTAPGQIDCWGASDFGQISRPDRPSQMVSITAGDYFSCALVASTRRPRCWGKISKSGNTTEVIPHDSVFFRIFAGRTHVCGILLASREALCWGNNESGQCDPPKGLSFATLAAGIDHSCGIRDDSHEVVCWGDNKHGQLEVPSDLKFSTIAAGDFYTCGVTLGERQLLCWGSARAPKTIRVKDGLCVADCEHDQYDLMNTDVKDCAGPEEKICLPCARCKAGSYETSPCVPFSDRSCSSCKWCFSREMRDHPCRRTC…	Selaginella moellendorffii	155	155	43	31	1e-44	CR4	5e-36
XP_002962273.1	hypothetical protein SELMODRAFT_403931	547	MWSGSADPGIPIPGTFALCALHATDLRVRCMGIHHNGSNPPDTTQFLALSGGGHFACGVEYGSHFIVCWGELQVPQELQQVSYSIVASGGFHVCALRSDNSFVDCWGRIPAPPAGMAFASLVSGWGFSCGLTQAGTVACWGDLRKEILQPSNETFGSIFAGGNTACGVTLLGRLCCWGTADHGQSIPPTGLQFLSIAGGLYHTCGIRADNRQVLCWGDQDNGKLMAPLDVSFSQIAAGDFYTCGMRMDPPMDVVCWGNSVWYPRYQKNFTISRGMCVSECGRSQFQAADQLCPVVRDKVCLDCSVCVGNSEASPCGPLGDRKCDTRSQPRSTALVILLIAAALFLGSLLVLATWLYLLRREKSKEDDPKQQGDGKLEAVASKNENERSAGQALAMSALE…	Selaginella moellendorffii	155	285	69	29	3e-44	CR4	1e-33
XP_002967021.1	hypothetical protein SELMODRAFT_408347	462	MDLDGSNRLLRLIAIFLSIVSAAHAFGYMSTMAALWGSGSSPVKSFSVCGIDASSGNPRCWGTFAINNASIPPANISLWSLTGGAYFACGLTLDGHNPVCWGQTPGSIVPAAFQSVRYSTINCGGWHVCAIRDKSILPGDEGRVDCWGNNDFGQCSPPITIPMRSITAGDYFSCGLTQYTGRVVCWGQMSGDHNDSAQRNRFNQRSLFDTIAAGRTHVCGILRKDHRALCWGANDHGQCSPPEGVAFSAISAGMFHTCGIRLDNHSAQCWGDDSVGQSSAPAGVAFSLITAGDRYTCGVRLDRDDHGGVECWGNQVAAPPDLGFNASQGVCVESSSCRSTQFELAPLVVVAGDNLTETAATTGCKICSPCATCGDGFYEAAACGQSRDTECSSCAACRF…	Selaginella moellendorffii	154	154	44	30	3e-44	CR4	2e-36
XP_002976507.1	hypothetical protein SELMODRAFT_416539	520	MGTDIAEVELKDKKLFAISGGDNFACGLEYGSRFPVCWGDLQLPARLLNVSYTSISCGSSHCCAIRSSDSRADCWGNNGSPPGENFLSVSSGKNFSCGLTQDGALHCWGGVPESIQEAKNERFASVFVGGRSVCGLASSTMDALCWDEDHHGRSSLVPPGLKFSFLAGGLSHTCGIRADNHQVMCWGDDHLRQLQVPKSATFSSISAGNFHTCGVTRDDPAKLLCWGNNVAEFEIVNLNASQALCMGECGKNQFQMNKTSSQCPSLSDKVCLDCSICVGGNVETSPCGVNSDRQCGSVKIGSGRDAKRQGGKSVFVVVLYVSATLSLALIFMGAVWSYLCRIRRRKGKLRVLSTRNNEHFGNGVVSISAEELKLATKNYSEEMILGRGAFGTVYKGVLE…	Selaginella moellendorffii	146	309	63	28	3e-41	CR4	1e-34
XP_002973402.1	hypothetical protein SELMODRAFT_413726	1033	MLAPKNLSFAMIGFLLVASTTGFGYMNTISSMETRGLPFHDPSGSFPICVLQAQVLTPICIDETHVTQMPPPEKKFFAISGGARFTCGLDYGSRFPLCWGKLQVPALLQNVSYTSLSSGANHCCAIRSNDSRVDCWGEELAIALLEDESLVSVSSGVDFSCGVTQDGEVLCWGYVPDQVPQPKNEIFTSVFVGGYTICGVTSSTGETLCWGQDSSAFVYREIDLHASQAVCTNECGKNQYRVNRTSSPQQCPSLSDKVCLECSACVGGDFEISPCGADSDRKCGMIIGKNNLPASFNGPGRRNPTGLFFIMLPLVVTLSLGITFIGVWACQEYREKLVSNKQRLRKEVISLSSVELRAATNNYSEEMILGRGAFGTVYKGVLQNGHQVAVKRANSSREW…	Selaginella moellendorffii	148	447	67	28	2e-40	CR4	1e-34
XP_002977034.1	hypothetical protein SELMODRAFT_416993	668	MVLQVTFEQIIVISRSMKNVISVVRIQRLYLHSTNLKFRYRHYRPLCMGKYHKGGLNFISCTFAMEFHAHPPHPIGQFNGQKPPRSSPHPQAMVCAKKRYFTVMAATHILLHLILSLVALLSHGPVTPTQAFGVMGTLAPMWGQFDPTQDSSTKGTYHMCVIEAGSLLPHCLGNMSRNSSVTLVDPPKDTPFLALSAGAQFTCGLIYGSQVPLCWGDLDNNKLAVPEKLQKVSYSTIASGAYHVCALRSGAAAAVDCWGGKSNGESQPPVNGGPYVSLTSGWDFSCALTALGRAVCWGALTNRTFTHNHAEPNTSFDAIFAGRSYVCGVERQTGNATCWGDNSYSQSNVPPYTRFKTIAPSMFHTCGLIRDTGVADCWGDDFYSQVNATSLGVTFSTLA…	Selaginella moellendorffii	118	154	47	28	2e-31	CR4	1e-26
XP_005845729.1	hypothetical protein CHLNCDRAFT_53512	441	MPAPAAVVAAAGASPLVPAPQPAPAEPVELCAPGDTACVQRLATPGAVACWGSRHAWGPAPAEQPAAALAASTADDGYGGLAPAPSASYPEDDGSSDAATAAAVVANASVPTPLGSSLVFSTISAEDNYVCGLTSRGTIACFGSTTPMLPDDPNYLPPTELPFEGPFTKLATGATFACGLLANFSAACFGRMGDCQLWSGPGGSEARPTPLVVGGGLQFVELVAGSDHVCGVLFNGSAACWGSNSANQLGVDSADVATSLTPIAIADPSLAFVSLAAADTVSCGTLINASVACWGGYTDASQSELLPPQPRIVGADQIASLAARGSSMCGVTLQGQAGCAGVVGSYIDAQGYPETVFSEQPTPVPSPASFTTITVGGSGFYFHACGLTLEGAALCWGLN…	Chlorella variabilis	68.2	160	31	26	3e-16	CR4	6e-12
XP_002508396.1	predicted protein	467	MTRRAGAVLALALFVVVSPLDRLGVAADSPTLSAGARHTCAIDAADALHCWGDDSDGQTRVPADVAAWRAVAAAKGGCHTCGLALDGAARCWGCDANGEVSGVPTVPGGNRWISVGAGKGVSCGVAAVDRAVRCWGRFMPQVGANPWYGPWSRVTVGEDWVCALSANDAKARCRGWSANGQTNVPPSLANAAWLDLSAGFQHVCGVLATFPRSLACWGSGAAGESTPPTPTEEEMAADPSSSIGSWGAVSAGTHVTCGIVGAQRRLKCWGKALDYVPGSEYAAAFGEFGQVAGAADVATWGTIVSSSGGDSSGGACSWDVVATGKHHACAIVAQPSSSSSGAQYTNDSSNVSSNVDASLRWAAKEPGSTEPGRVVCWGDERGGKTRVPSAGVTLPWRAW…	Micromonas sp. RCC299	58.5	224	32	26	3e-13	CR4	3e-07
Q9S7D9	ACCR1_ARATH| Serine/threonine-protein kinase-like protein CCR1	775	METRCSLLFLSLILLYLPKPGSGFGSSGPIAASFGGSAFFCAIDASGRQDVICWGKNYSSPSSPSSSSSSSSIASSTSASYNIPSMAVLSGGDGFLCGILSNTSQAFCFSSLGSSSGMDLVPLAYRTTAYSQIAAGNSHVCAVRGAYYSDHDSGTIDCWEITRATNNNSLIAKENPNFYDQIVSNLVFNNIVSGDGFSCGGIRDGGMLCFGPNSSNLGFNTTSDNFQVLAAGKNSVCAILNLSREVKCWGEDESFVNSPMNDSRFVSLTAGPRHFCGIREDNHEVECWGNSNFSLIPKGSGFKAIASSDFIVCGIREEDLVLDCWMVNGSSTLAYDPPLELCSPGMCRAGPCNEKEFAFNASILNEPDLTSLCVRKELMVCSPCGSDCSHGFFLSSSCT…	Arabidopsis thaliana	-	-	-	-	0	CCR1	0
XP_004143354.1	PREDICTED: serine/threonine-protein kinase-like protein CCR1-like	770	MEIGCTLFKSCKFLLPLCVFLHLFFVFAYGFGSMAPISAAFGLDGFFCAIDASGKQEVICWGKNSSSLSPSSSSSTSIFSVDIPAMAALSGGDGFLCGILANTSHAYCWGSVNPGTDLVPLVFRTTAYSHIAAGKSHVCAIRGSYYSDNDSGPVDCWDISRNSINNTLSSKQSTLFYNQSIASLVFKRVVSGEGFSCAELRDGGILCWGPNSTNLDVSNVSENFIVLAAGKDALCGISEVTGGVKCWGNADSFAGLPTTARYVTLTAGEQHFCGIRWDSHEVDCWGSLNSSSIPKNTGFMAIASSDRSICGIREDNLVLDCWFFSHSFEAAPGYDPPLELCSPGLCAAGPCREGEFSFNASILNEPDLKSLCVRKDLSICFRCGVNCSDGFFLSSPCTL…	Cucumis sativus	960	960	99	61	0	CCR1	0
XP_004156339.1	PREDICTED: serine/threonine-protein kinase-like protein CCR1-like	770	MEIGCTLFKSCKFLLPLCVFLHLFFVFAYGFGSMAPISAAFGLDGFFCAIDASGKQEVICWGKNSSSLSPSSSSSTSIFSVDIPAMAALSGGDGFLCGILANTSHAYCWGSVNPGTDLVPLVFRTTAYSHIAAGKSHVCAIRGSYYSDNDSGPVDCWDISRNSINNTLSSKQSTLFYNQSIASLVFKRVVSGEGFSCAELRDGGILCWGPNSTNLDVSNVSENFIVLAAGKDALCGISEVTGGVKCWGSADSFAGLPTTARYVTLTAGEQHFCGIRWDSHEVDCWGSLNSSSIPKNTGFMAIASSDRSICGIREDNLVLDCWFFSHSFEAAPGYDPPLELCSPGLCAAGPCREGEFSFNAGILNEPDLKSLCVRKDLSICFRCGVNCSDGFFLSSPCTL…	Cucumis sativus	956	956	99	61	0	CCR1	0
XP_003536986.1	PREDICTED: serine/threonine-protein kinase-like protein CCR1-like	767	MQILTALSFSSFFLLLLFLFLFGNAHGFGSMGPISASFGRDEVFCSIDASGKQDVICWGNNATSPSLSAVANAIPAMSALSGGEGFLCGILANTSQAFCWSAVTKPSADLILVPPAYRNTAYSHIAAGQNHVCAVKGSYFADRDSGTVDCWEITKTANKTLTAKQSDKFNDQLMSNLEVKRVVSGEGFTCGEVNDGGLICWGPTSENLGNINISNVTDSFAVLVAGRSAVCGVFNVSGELKCWGDPVSYSDPPLDSVRLVSLSAGANHFCGVRMDNHEVECWGDLNSSVVPKGNGFMAIASSDFTTCGIREDDLLLDCWLVNASKPDFDPPLELSSPGLCRASECGVDEFAFNVSVLNELALTSLCVREDLRICSPCGSNCSKGYFLSSECTRNADRVC…	Glycine max	961	961	97	61	0	CCR1	0
XP_003541409.1	PREDICTED: serine/threonine-protein kinase-like protein CCR1-like	762	MQIISHSSFFLLLLFLFLCSNANGFGAMGPISASFGKDEVFCSIDASGKQDVICWGSNATSPSLSTVSNALPAMSALSGGEGFLCGILANTSQAFCWSAVTRPSADLILVPPAYRNTAYSQVAAGKSHVCAIRGSYYADRDSGTVDCWEITKTANKTLTAKQSDKFIDQLISNLEVKRVVSGEGFTCGEVNDGGLICWGPTSENLGNISNVSDTFAVLAAGRSAVCGVFNVSGELKCWGDPVSFSDPPLDSVRLVSLSAGANHFCGVRMDNHEVECWGDLNSSVIPKGNGFMAIASSDFTTCGIREDDLLLDCWLVNASKPDFDPPLELSSPGLCRASECGVDEFAFNVSVLNELALTSVCVREDLRICSPCGSNCSKGFFLSSECSRNADRVCTACSL…	Glycine max	955	955	97	62	0	CCR1	0
XP_002323466.1	hypothetical protein POPTR_0016s09060g	765	MQLQSCFIGLFLLLSCISASGFGSMGPISAAFGDHAFFCAIDASGKQDVICWIKNNTLPPSSSSASTSAYFSNIGPIAALSGGEGFLCGILANNSQVFCWSSVYSGPDLVPSVYRNTAYSHIAAGKNHVCAIRGSYYSDHDSGTIDCWNIINGANNSLTSVQGTGVFYDQSISNLVFDKVVSGEEFSCGGVRGRGVVCWGPNKDRFGVSNFSENYMVLASGRDSVCGILEGSNDVKCWGNSTNSYSTPPVGTRFVSLTAGTNHFCRIREDNHAVECWGSFNSSLIPKGGSGFMAIASSDFTTCGIREDDLVIDCWFANGTLPPDYSPPLELCSPGLCSPRSCGEGEFVFNASILNEPDLTSLCVRKDLKICSPCGSNCSEGFFLSSPCTENADRVCTAC…	Populus trichocarpa	1000	1000	98	65	0	CCR1	0
XP_002991025.1	hypothetical protein SELMODRAFT_132932	727	MCSIAASYGEDDPLFCAVEATFEQQVFCWGRNESLEWPSTGPAMLGLSGGMGFMCGIAAGSQRPFCWRKNLTSINIVPEQFQNTSYDSIAAGDGHVCAARSQDALVDCWNGDDSLNVPRGVTLRSLVAGRRFVCGIETGDGGTARCWGDANLAATAPPGDVEFESLSAGGEHACGIVRKSREIRCWGDNRLGQTDAPRGIPFVVLSLGLNHGCAVRQDTHGVMCWGRGFNASAAPDRTEFLALASSRVVTCGVREDNLLVVCWGNGTEFAPPLQLSSPGVCTAAPCSAGEFSFNASSLGVVTAGLCSSSTQQVCAPCASDCSNGSFVSAPCGANDNRRCTDCSLCETSLCRGLCHLSPAPESSAVGVEERRHRAVSLAAVLGAAISGGVVVAVIGLLAW…	Selaginella moellendorffii	548	548	95	42	0	CCR1	7e-89
XP_002991715.1	hypothetical protein SELMODRAFT_134022	730	MCSIAASYGEDDPLFCAVEATFEQQVFCWGRNESLEWPSTGPAMLGLSGGMGFMCGIAAGSQRPFCWRKNLTSINIVPEQFQNTSYDSIAAGDGHVCAARSQDALVDCWNGDDSLNVPRGVTLRSLVAGRRFVCGIETGDGGTARCWGDASLAATAPPGDVEFESLSAGGEHACGIVRKSREIRCWGDNRLGQTDAPRGIPFVVLSLGLNHGCAVRQDTHGVMCWGRGFNASAAPDRTEFLALASSRVVTCGVREDNLLVVCWGNGTEFAPPLQLSSPGVCTAAPCGAGEFSFNASSLGVVTAGLCSSSTQQVCAPCASDCSNGSFVSAPCGANDNRRCTDCSLCETKLCRGLCHLSPLPVAPEISAVGVEERRHRAVSLAAVLGAAISGGVVVAVIGL…	Selaginella moellendorffii	549	549	95	42	0	CCR1	2e-89
XP_006367010.1	PREDICTED: serine/threonine-protein kinase-like protein CCR1-like	765	MNTLFIKITFFHLLCFIFLKSASGFGSMGPISAAFGKNGFFCAIDASGKQDVICWGNKTNNPSLPDVLNYPTDVPSMAALSGGDGFLCGILSNTSQAFCFDSMGSRSDLVPNVYKPNAYSHIAAGRNHVCAIRGPYYSESDWGSVDCWDIIRKSNGTFVSRESSLFYNQYTSSYVFKKIVSGDGFSCGGVKDGGILCWGPNSSGLGISGLSENVHALTAGIDSVCGVLEESSEVKCWGSNVSFGIPPVGVPFVSLAAGVEHFCGIRQDNHGIMCWGNYNSSLIPKGSGFLAIASSDFITCGIREGDLVLDCWYTNISSKVDYDPPLQLCSPGLCTPGSCGEGKFSFNASLINEADLINLCVRKDLKICSPCGVNCSEGFFPSSSCTENADRVCTTCSLC…	Solanum tuberosum	990	990	99	63	0	CCR1	0
CAN69888.1	hypothetical protein VITISV_005074	767	MPILNALSPLVPLLLLLLLLLLCIPTSGFGSMGPISAAFGEHGFFCAIDAGGEQNVICWGKNSSSFPTPSASFSNIPPMXALSGGNGFLCGILANTSQAYCWSLVASGINLVPSVFRNTAYSHVAAGKNHVCAIRGSYYSDNDSGTIDCWVISGRPNNSLASVENSNFVDQSINSLVFRKVVSGEGFSCGGIREGGIVCWGPNASKLGVSGVSENFKALASGRGSVCGISGVSGEVTCWGDNDTSGAPPIGTRFIALSAGARHFCGIREDTHEVGCWGSFNSSLVPKGPGFMAIASSDFTTCGIREDDLVLACWFANLSSPPDSDPPLQLCSPGLCTPGPCDEGQFAYNASILNEPDLTSLCVRKDLSICSPCGLNCSEGYFQSSSCTKNVDRVCTACS…	Vitis vinifera	1000	1000	97	65	0	CCR1	0
CBI31474.3	unnamed protein product	474	MKLANNTTHFSCTCKANNRFSSSNGVSLGWRGVHVRYYIEHFSGLLLGLVKFREVDLILDCWGVHLQSTQDYNPPLQLCSPGVCSSGGCGDGKFAFNASILNEPDLMSLCVRKDLKICLPCGSNCSEGFFPSSVCTENADRMCIACSLCQNSSCWDVCGLPPSSDISPQERHEMKKLILIIGSSALGSILVLSLCCLLPRMIESKNEEKEKKWCISCVSKPGVEADPSPDPQTPLPVTPCVGTTQVFRLSELKDATNGFKEFNELGRGSYGFVYKAVLADGRQVAVKRANAATIIHTNSRDFEAELEILCNVRHNNIVNLLGYCAEMGERLLVYEFMPHGTLHDHLHEELSPLNWNLRLKISSQAARGLEYLNGGMESDVYNFGIVLLEILSGRKAYDR…	Vitis vinifera	531	531	59	59	0	CCR1	1e-140
F6HNH5	Putative uncharacterized protein	653	MAPIAAAFGDNGFFCAIDAGGKQEVICWQRNKNESSSLSSPYISSLPPMASLSGGEGFMCGITSNTSQAYCWDLSNSVSDGGVACWGPKSGTLGVSAVSEDFETLASGRGSVCGISTVSGEVECWGDADEFGAPPVGTNFVGLSAGASHFCGVLKDDHEVQCWGNIDGAVVPKGSGFIAIASSDFTICGVREVDLILDCWGVHLQSTQDYNPPLQLCSPGVCSSGGCGDGKFAFNASILNEPDLMSLCVRKDLKICLPCGSNCSEGFFPSSVCTENADRMCIACSLCQNSSCWDVCGLPPSSDISPQERHEMKKLILIIGSSALGSILVLSLCCLLPRMIESKNEEKEKKWCISCVSKPGVEADPSPDPQTPLPVTPCVGTTQVFRLSELKDATNGFKE…	Vitis vinifera	731	731	75	60	0	CCR1	0
XP_002274471.2	PREDICTED: serine/threonine-protein kinase-like protein CCR2-like	765	MPILFLTRFSLLFSLFFVPASGYGSMAPIAAAFGDNGFFCAIDAGGKQEVICWQRNKNESSSLSSPYISSLPPMASLSGGEGFMCGITSNTSQAYCWDLSNSGRDLVPRGFRYTSYMQIAAGSNHVCAIRGSYYSNTDHGNVDCWEFDQTLMNGNKTTGFVNNSSFHDPHIESFGFKKIVSGEGFSCGAVSDGGVACWGPKSGTLGVSAVSEDFETLASGRGSVCGISTVSGEVECWGDADEFGAPPVGTNFVGLSAGASHFCGVLKDDHEVQCWGNIDGAVVPKGSGFIAIASSDFTICGVREVDLILDCWGVHLQSTQDYNPPLQLCSPGVCSSGGCGDGKFAFNASILNEPDLMSLCVRKDLKICLPCGSNCSEGFFPSSVCTENADRMCIACSLC…	Vitis vinifera	904	904	99	58	0	CCR1	0
XP_002276043.1	PREDICTED: serine/threonine-protein kinase-like protein CCR1-like	767	MPILNALSPLVPLLLLLLLLLLCIPTSGFGSMGPISAAFGEHGFFCAIDAGGEQNVICWGKNSSSFPTPSASFSNIPPMSALSGGNGFLCGILANTSQAYCWSLVASGINLVPSVFRNTAYSHVAAGKNHVCAIRGSYYSDNDSGTIDCWVISGRPNNSLASVENSNFVDQSINSLVFRKVVSGEGFSCGGIREGGIVCWGPNASKLGVSGVSENFKALASGRGSVCGISGVSGEVTCWGDNDTSGAPPIGTRFIALSAGARHFCGIREDTHEVGCWGSFNSSLVPKGPGFMAIASSDFTTCGIREDDLVLACWFANLSSPPDSDPPLQLCSPGLCTPGPCDEGQFAYNASILNEPDLTSLCVRKDLSICSPCGLNCSEGYFQSSSCTKNVDRVCTACS…	Vitis vinifera	1004	1004	97	65	0	CCR1	0
XP_002965188.1	hypothetical protein SELMODRAFT_406398	496	MPPFATAAVLAACLLASLPAEGFNPMGTIAATWSGQDNPVPGAFSVCAIQATALYVECLGTSHNNSLPPKEKEFLALSGGGLFTCGLDYGSHFLVCWGIITVPDTFQQVSYTSVASGGDHVCALRGDNSNVDCWGNIDQPPPKLAFASLISGKGFSCGLTREGSAICWGGLRQDVAQPVNQTFRAIFAGSSNVCGVTSLGDLGCWGGDDHGQSRPPVGFKFLAIAGGLYHTCGIRADDRRVLCWGNNEHKQLSAPLDVPFSAIAAGDFYTCGVRLDRAMQVLCWGNSVVYPHEASFNVSPAPCVSACGRDEYQFDQLSLPCPVLRDKVCLACSQCLHMQEISACGASADRMCGFGTSTTGSARSYQRQLRRRLALVLILVAVILALGFAVICAYLCLRR…	Selaginella moellendorffii	168	168	69	29	5e-49	CCR1	2e-38
XP_002962274.1	hypothetical protein SELMODRAFT_403932	486	MPPFVAAAVLAACLLASLPAEGFNPMGTIAATWSGQDNPVPGAFSVCAIQATALYVECLGTSHNNSLPPKEKEFLALSGGGLFTCGLDYGSHFLVCWGIITVPDTFQQVSYTSVASGGDHVCAVRGDNSNVDCWGNIDQPPPKLAFASLISGKGFSCGSLERDQRFAGGDLGRMAIFAGSSNVCGVTSLGDLGCWGGDDHGQSRPPVGFKFLAIAGGLYHTCGIRADDRRVLCWGNNEHAQLSAPLDVPFSAIAAGDFYTCGVRLDRAMQVLCWGNSVVYPHEASFNVSPAPCVSACGRDEYQFDQLSLPCPVLRDKVCLACSQCLNMQEISACGASADRMCGFGISTTASARSYQRQLRRRLALVLILVAVILALGFAVICAYLCLRRKEDDRQDAGK…	Selaginella moellendorffii	151	151	72	28	3e-43	CCR1	8e-34
XP_002971527.1	hypothetical protein SELMODRAFT_412300	457	MATIGSMWTGYPYIDVGDYSICVLQANSLQPIYLGKFISPVGVPKDKKLLAISGGSGFVCGLLYGSQFPICWGDIELPQSLENISFTSLNCGRSHCCAIRSDDSKINCWGIFIYKSPDQPFVSVSLGIDFSCGLTQDGNITCWGHLSDAIPQPDRGTGTFVSLFAGGYSICGIESSTRDILCWGEDASYTYAPSVFQFSSVTGGRYHMCGIRADNHQVVCWGQNNVYQLRAPKNVSFTAISAGDFYTCGFTRDGRLRVLCWGGYKEEYWEVNITGIHVSQAICSSRCRKDQYQTSKYGCPSLTDRVCLDCSVCTGDDIELVPCGINTDRVCGKPSLASHQGDIKNLRKLFLVLLYLIITLSFGLILMATFSYFTYMKKRKLETLANIVSFSRSDILYFS…	Selaginella moellendorffii	140	256	70	27	7e-40	CCR1	4e-31
O80963	ACCR2_ARATH| Serine/threonine-protein kinase-like protein CCR2	776	MQPNSHIFVIITISSLIITVSAYGSTGTIAAAFGENGFFCAIDASGKQEVICWDRGNTNRSLNRPPGEISGYSPPMTSLSGGEGFLCAITSNTSRAFCWNLEDPSENLVPRAFQYNSYLQIASGNNHVCAISGLYYSGPDYGPVHCWEYSDNTNFTSGLLWNSSFHNPYIDSLMFRKIVSGDGFSCGVTKDGDLVCWGPKSNLLNFSNNEEFEVLASGRNSVCGVSKDSGQLHCFGDETEFGSLPNRPRFIALSAGANHYCGIREDDHGVECWGRNLNSSSSSSAPNTSGFVAISSSDSTTCGVRELDLVLDCWRVHDSSKADYSPPLELCSPGMCSPRGNCGDGWFAFNASILKESELTSLCSFHNLNICLRCGISCLEGYFPSSTCNPNADRVCTPC…	Arabidopsis thaliana	-	-	-	-	0	CCR2	0
XP_002315299.2	hypothetical protein POPTR_0010s22800g	761	MVIQRCLSGSVITMTVLLLLLVLPVNVLGYGSLGPIAAAFGENGFFCAIDAGGKQEIICWDKGDNFSVSTSTAYFSSLPAMASLSGGEEFICGITSNNSQAFCFNLSNPGNNLVPKSFQYNSYSQIASGKYHACAIKGSYFSSVEYGNVDCWEFNQTSSFDSFHNSYIDSLVFRRIASGDGFSCGVIKEGGLVCWGPRSANLGVSAVSGEFEILASGRGSVCGVSNVSSEVECWGNSDELGSLPVGTRFVGLSAGARHFCGVREDNHEVECWGNFDLASIPKGSGFMAIASSDYATCGVREVDLVLDCWGVHGKSLPDYSPPLQLCSPGVCWPSSCGHGKFAFNASLLNEPELTNLCVRKDLKICLPCGTNCSEGYFPSSTCSENADRICTACSLCQNS…	Populus trichocarpa	958	958	97	25	0	CCR2	0
XP_003056408.1	predicted protein	433	MRRHRTEFVRAFPARIALLALLASIHCATRARAESPTIGAGDAHTCAIDGANALWCWGAKDDDRCDAPRGPHVAVAVAKGGCHACAIASDASMSCWGCDERLQASGIPTSSDTLRGWVAVACGKTFSCGIVNDGSGNVRCWGEPLPAIGTRDAWVGPFATVVAGEDYVCALGKDDGLARCRGWDSSAQASIPATLANVAFVAIAAGFAHTCGVTRTEKSLRCWGGNVAGESALPNATSAGGDGGGYATGATVVAAAWGAIGVGARWTCGVVGSARELTCWGLRRDYPPAAAAHFEEYGQVHSSGAVVSKNGACAWDVVAVGKRHACGITASSSDAGPAGSAMCWGDDSHGQSAPPGEGDGVVLPWKAWPTETEVNATGSAILALKTSAGATALCDADVV…	Micromonas pusilla CCMP1545	70.9	118	38	25	3e-17	CCR2	1e-11
Q9LY50	ACCR3_ARATH| Putative serine/threonine-protein kinase-like protein CCR3	814	MKRFINSTVTFSVTVTIAVIIFFLLSPVTSLGSGSTYAVVYGSDTVCALISGQPTQRILCYDTRLNINVTLNPGVSFSSIAAGDNFLCGIRSGGYSLLCWDNIGSYSPNRKRIYQNDNVLLETLSVGDKQICATVNGTNSLKCWRGSVSDQSKPPNERFRSISSGVGFSCGVSIRNNRILCWGTDPVKSNQIQTGFGNTPMVTISAGKSHACGLNTTGNLICIGNNDSGQLNVIAPDQPNLYSSSLSLGSNFTCAMRISNNSVVCWGGGAERFNNVTDSISFESISSGPGLICGLISSNLSIMCWNPTNFSRIFLPFPEVLPGPCVESSSSSLCSCGVYPQSDKLCSGTGSICKSCPIQFPASPPSQFPLPPPPPPPPPSPSTSSPPSKALTRGLLAFA…	Arabidopsis thaliana	-	-	-	-	0	CCR3	0
XP_004145316.1	PREDICTED: putative serine/threonine-protein kinase-like protein CCR3-like	747	MTSELVILVVVLISLQLHWGVDALGSASTVAVAYGTSTVCGISAGKKSQRIQCHRGDQVISILPQVSFEAISGGQSFFCGLRTGGFSLHCWETDAGFSNHSFQPKRIYYSTNFPLTDLAVGDAQVCAREISSGKAICWRGSNRVGSLFPSPDPALDFLTITSGSGFSCGILKNKTVRCWGNNGIGSKIQSQLGNLLMASLVAGESHVCGLTALDGVLVCKGNNNAGQLEVPSNSAHEYSDLALGTSFTCAIRQNNGVVSCWGEGANELNIEKNINVSVSFELITAGSDMLCGLKTNNLTIMCWSKANNNSPVVLPLGMIIPGPCVQDSCSHCGIYPNSAFLCDGSGNICKSCQRELPFAVPLPKSPNSSSNPGSSSPTKSINRLTMAFLIVGAIGALAG…	Cucumis sativus	642	642	96	47	0	CCR3	1e-170
XP_004149247.1	PREDICTED: putative serine/threonine-protein kinase-like protein CCR3-like	821	MTILSSPPLALALLTLFAVLFPLFPSIQALGSASTLAVSYGSRTVCGIVAEQPTQRILCFRDGQTIFIEPGISFSAVSGGRNTFCGIRSGGYTILCWNFNLTTAAFTRRRLYYNPNVLLENLAVGDDQICATVVGAGNVTCWRDGNKVIGGFSSLLYDSISSGYGFSCGILKGNQSIRCWGRNSSIATEIENGFRNISMLSIVAGGFHVCGLNISGGLVCKGNNDFGQLDFPSNYSVEFSELALGERHSCGILVSNRSVICWGGLGFSVDLIRETSFELISSGSDFVCGLTTSNFSVLCWGPGWSNNSLSPSSLSLPKILPGPCVLQSSCSCGVYPLSQTLCSNSGNVCNRCFFTVPTPSSPQPLPSSPPRSPPVTTPSPTPAALKRGLLAFGIVGSVG…	Cucumis sativus	905	905	96	62	0	CCR3	0
XP_004163787.1	PREDICTED: putative serine/threonine-protein kinase-like protein CCR3-like	803	MTILSSPPLALALLTLFAVLFPLFPSIQALGSASTLAVSYGSRTVCGIVAEQPTQRILCFRDGQTIFIEPGISFSAVSGGRNTFCGIRSGGYTILCWNFNLTTAAFTRRRLYYNPNVLLENLAVGDDQICATVVGAGNVTCWRDGNKVIGGFSSLLYDSISSGYGFSCGILKGNQSIRCWGRNSSIATEIENGFRNISMLSIVAGGFHVCGLNISGGLVCKGNNDFGQLDFPSNYSVEFSELALGERHSCGILVSNRSVICWGGLGFSVDLIRETSFELISSGSDFVCGLTTSNFSVLCWGPGWSNNSLSPSSLSLPKILPGPCVLQSSCSCGVYPLSQTLCSNSGNVCNRCFFTVPTPSSPQPLPSSPPRSPPVTTPSPTPAALKRGLLAFGIVGSVG…	Cucumis sativus	893	893	95	62	0	CCR3	0
K7LQT5	Uncharacterized protein	819	MTPPFTLSLSLFSILAVTAVHGLGSAATTAVTYGTATVCGIVAGEPQHRIQCSRNGSRVVPLTLPNASFDAISGGRSFFCGLRSGGRSLHCWDTAATTASFRPKRVFHSDVVQLADVAVGDSQVCAREVQSGVVRCWRGSGGAQFSSPSESLRFRSITCGCGFSCGIVKESGRVVCWGDDNEGANRKGSISDEIHREFKNFTMSSLVAGVSHVCGLTLHGALVCKGNNDSGQLGYNNNNNGGVFLTTSLDHFSGLALGEDFTCGIRTRNGVVVCWGGGFDSNVVKGVSFESLVAGLDYVCGLTTRNLTVVCWGKGRFFHHVPSEVPLGVILPGPCVEGACSGSCGTYPDSGALCHGSGSICYSCQTEIPLAVPLLPPSSSTTTQAVPNQEQPSSRGGKN…	Glycine max	765	765	95	50	0	CCR3	0
K7MPJ0	Uncharacterized protein	804	MKTPPSSSVNLCLAVAVAAVLILSLVPSSHGFGSGATLALSDSSSTVCAVVASESTRRIECYRQGQVVPIAPNVSFSSISGGRNYFCGIRSSNSNLLCWNTSSSFERRRLYNDSSVPLENLAVGDTHVCATAVGDGTVRCWRTGNTFQIVSGSDQFASISSGSGFSCGILKNGSRVRCWGDTNVSEQIENSFRNISMLSLVAGGSHVCGLNLTGFLVCRGSNGSGQFDIPQGGAFEYSGLALGAEHGCAIRESNGSVVCWGGNGQFSVSNVTEGVSFEVIVSGSNFVCGLTTNNLTVVCWGPGWSNGSRFELPLPRVLPGPCVQSSCGECGSYLNSEFLCSGSGNICKPMTCRPQTTVPPPLLPSPPPPSPSPPPPPSLTSPSPSPSRSKTLTRGLLAF…	Glycine max	872	872	99	60	0	CCR3	0
XP_003519396.1	PREDICTED: putative serine/threonine-protein kinase-like protein CCR3-like	795	MKNNKSPFSAATFTLFNATLLILSSLSPTHALGSAATLAATSSAVCGVVASEPTRRIACYRHGEVVAVAPNVSFSAISGGRSYFCGLRSGNYSLLCWDTLSGFQSKRLYNNGTVLLEKLALGDSQVCATVVGAGTASCWRTNAAFESPSGSDRFDSISSGSGFSCGILKGSDRVRCWGVGSIARKMESEFGNMSLVSLVAGESHICGLNSSGYLVCRGSNDFGQIDVPEGGALEFSGLALGAEHTCAIRRSNGSVVCWGGRGLFEDDVTKTVSFEVIVSGSNFTCGLTTNNFSVICWGPGWANGSGYEIPLPPILPGPCVQSSCSECGIYPQSESLCSGYGNICKPKPCWPEMLVPAPPAVVPASPPGPAASRSKALTKGLLAFAIVGCVGGVAGICTA…	Glycine max	882	882	99	60	0	CCR3	0
XP_003537490.1	PREDICTED: putative serine/threonine-protein kinase-like protein CCR3-like	805	MKTSPSSVNLCLAVAVAAVVLILSLVPSSHGFGSGTTLALSDASATVCAVVASESTRRIECYRQGQVVPIAPNVNFSSISGGRNYFCGIMSSNSNLLCWNTNSSFEMRRLYNKSSVPLENLAVGDTHVCATAVGDGTVRCWRTGDTFRNPSGSDQFASISSGSGFSCGILKNGSKVRCWGDTNVAQQIENSFGNMSMLSLVAGGSNICGLNSTGFLVCSGQLDFPRGGAFEYSGLALGAEHGCAIRGSNGWVVCWGGNGQFSVNNVTEGVSFEVIVSGSNFVCGLTTNNLKVVCWGPGWSNYSNSSRFELPLPRVLPGPCVSFSCAECGSYVDSQTLCSGSGNICKPMTCRPQTTAPPPLLPTPPPPSQSPPPPPSTPPPSSTRSKTLTRGLLAFAIIG…	Glycine max	843	843	97	59	0	CCR3	0
XP_003539327.1	PREDICTED: putative serine/threonine-protein kinase-like protein CCR3-like	830	MTPPFTLSLSLFSILAVTAVHGLGSAATTAVTYGTATVCGIVAGEPQHRIQCSRNGSRVVPLTLPNASFDAISGGRSFFCGLRSGGRSLHCWDTAATTASFRPKRVFHSDVVQLADVAVGDSQVCAREVQSGVVRCWRGSGGAQFSSPSESLRFRSITCGCGFSCGIVKESGRVVCWGDDNEGANRKGSISDEIHREFKNFTMSSLVAGVSHVCGLTLHGALVCKGNNDSGQLGYNNNNNGGVFLTTSLDHFSGLALGEDFTCGIRTRNGVVVCWGGGFDSNVVKGVSFESLVAGLDYVCGLTTRNLTVVCWGKGRFFHHVPSEVPLGVILPGPCVEGACSGSCGTYPDSGALCHGSGSICYSCQTEIPLAVPLLPPSSSTTTQAVPNQEQPSSRGGKN…	Glycine max	771	771	95	50	0	CCR3	0
XP_003544086.1	PREDICTED: putative serine/threonine-protein kinase-like protein CCR3-like	796	MKKNKSPFSAATFTLFIATLLILSSLSPSHALGSAATLAVTSSAVCGVVASEPTRRIACYRHGEVVAVAPNVSFSTISGGRSYFCGLRSGNYSLLCWDTLSAFQSKRLYNNGTVLFENLALGDSQVCATVVGAGKASCWRTNAAFESPSGSDRFDSISSGSGFSCGVLKGSDRVRCWGVGSIARKMESEFRNMSMVSLVAGESHVCGLNSSGYLVCRGSNNFGQIDVPEGGALEFSGLALGVEHTCAIRRSNGSVVCWGGRGLFEDNVTKGVSFEVIVSGSNFTCGLTTNNFSVICWGPGWDNGSGYEIPLPPILPGPCVQSPCSECGIYPQSASLCSGYGNICKPKPCLPEMLVPAPPVVMPATPPSPPPASRSKALTKGLLAFAIVGCVGGVAGICT…	Glycine max	883	883	96	61	0	CCR3	0
XP_003552840.1	PREDICTED: putative serine/threonine-protein kinase-like protein CCR3-like	809	MKTPPSSSVNLCLAVAVAAVLILSLVPSSHGFGSGATLALSDSSSTVCAVVASESTRRIECYRQGQVVPIAPNVSFSSISGGRNYFCGIRSSNSNLLCWNTSSSFERRRLYNDSSVPLENLAVGDTHVCATAVGDGTVRCWRTGNTFQIVSGSDQFASISSGSGFSCGILKNGSRVRCWGDTNVSEQIENSFRNISMLSLVAGGSHVCGLNLTGFLVCRGSNGSGQFDIPQGGAFEYSGLALGAEHGCAIRESNGSVVCWGGNGQFSVSNVTEGVSFEVIVSGSNFVCGLTTNNLTVVCWGPGWSNGSRFELPLPRVLPGPCVQSSCGECGSYLNSEFLCSGSGNICKPMTCRPQTTVPPPLLPSPPPPSPSPPPPPSLTSPSPSPSRSKTLTRGLLAF…	Glycine max	877	877	100	60	0	CCR3	0
XP_003552952.1	PREDICTED: putative serine/threonine-protein kinase-like protein CCR3-like	812	MTPPFTLSLSLFVILTITAVHGLGSAATTAVTYGTATVCGIVAGEPQHRIQCSRSGRRVVPLTLPNVSFDAISGGRSFFCGLRSGGRSLHCWDTAAPNAYFRSKRLFHSDVVQLADVAVGDSQVCAREVQSGVVRCWRGSGGVQFSSPSEGLRFRSNSITCGCGFSCGVIKESGRVVCWGDGDEGANTKSISDEIQRKFENFTMSSLVAGVSHVCGLTLHGALVCRGNNASGQLGNNDGVLSSSLEFSGLALGEDFTCGIRTRNGVVVCWGGGFESDVVKGVSFESLVAGLDYVCGLTTRNLSVVCWGKGRFFHVPSELPLGVILPGPCVEGACSGSCGTYPDSGALCHGSGSICYSCQTEVPLAVPLLPPSTTQVVPKQEHSSRGGRSLREFLIFFIV…	Glycine max	776	776	95	52	0	CCR3	0
BAJ85324.1	predicted protein	842	MTRAQPTPQLAAALLLLPLLLLAPVEVTASTLAVAGGSAVCGVAADNGTVYCVAAYNSSASPVAPYLVFSQVSGGAGFLCGVGAVPGGGGGVPALFCWPPAAPGQLRRVYRGPDLLLDVAVGADHVAAYDGQARGIRWWRGGSGAFPTDLVQGAFGSLVSGDGFTCAMDAGSAVRCWGTRGSAVQAAFANASLSSLAAGGSRACGVVSATGAVLCSGAGAGVLPQSGLEPHGLAVGDSHACGLRRNNHTAVCWSLAGPTPTVYYPAYGTEFVFLVAGGNLTCGLVTANFTVLCWSSSSTSSAAYNEAVMVALPAVLPGSCVPDGSSCQCGVFPRSAELCTTARAGGGVICNRVCPPPPPPPAAPASPPESPASKRVSKVWIAFAVVGAVGVFAGICSII…	Hordeum vulgare subsp. vulgare	591	591	93	44	0	CCR3	1e-134
AES99595.1	Receptor kinase-like protein	925	MKKISLSSIIFSTFTFVILISSLPVTNALGSGTTLAVVDSTATVCGIISSQKTHKIICYRHGHLITAVPEVSFSSISGGRNYFCGIRSGNYSILCWDTVSSNTTFETRRLYNNNNGTVLYENLAVGDSHVCATMVNVGNVACWRMNKGFVLPSGFDQFSSITSGFGFTCGILKKNDSGSVRCFGNVNVNESSIAEKIEKEFVNVSMVSLVAGESHVCGLNSKGFLVCKGSNNFGQINVPNQVEPLEYSDLALGAEHSCAIRRSNGSVVCWGGNGLFDVNVTKNVSFEVIVSASNFTCGLTTNNFSVVCWGPSWNGSTFQLPLPPILPGICVQSSCSECGMYPQSQYLCSGFSNICKPKPCWPQMDVPVPSQIATPPQPGLPCSRSKTLTKGLLLFAIVG…	Medicago truncatula	870	1071	97	58	0	CCR3	0
XP_003600912.1	Serine/threonine protein kinase-like protein CCR4	788	MKNLITHLIFVTAIIIFYLSPSAHTLGSGTTLSVTDSPATVCGIISGETTQHIQCYREGEVFNILPNVSFSSISGGRSYFCGLRSGNYSLHCWDSSSFQTKRLYSNDSFLLENLSVGDFQVCATVVGVGTVRCWRTFDGFEPSGLDHFGSISSGSNFSCGILKTGLQVRCWGEKTVAERLQNEFRNMSMLSIVAGGSNVCGLNSTGFLVCKGSNSSGQLDVPQGGAFEYGDIALGDEHGCAVRRLNGSVVCWGGKGEFSADSIEGVSFELIVSGSNFTCGLTTTNFSVVCWGPGWSNGSNGSESILPLSRILPGPCVQSSCSECGIYPDSQSLCSNFGHICNPNICNTQITSPPPPPPAPSPPRSSRSKTLTTGLLVFAIVGSVGGFIGICTIIYCLWT…	Medicago truncatula	835	835	97	58	0	CCR3	0
EEE62193.1	hypothetical protein OsJ_16980	798	MTPLLLLLLLPLLLLAPASASTVAIAAGPTACAVAEGNSTVYCASATNSSSSAAVAPFVSFSQVSGGGGAFVCGLQVGGRALFCWPAAAPGQLRRVYNGPGQLSQLAVGGGHVAAYDAAARVIRWWRGGDRFPLWFGGGFASLVSGDDFTCAVETSTSAVRCWGPRGGAVEAGFLNASVSALAAGGSRACGVRRNDGGVLCSGGGVLAPREDLYVDGLAVGDSHACGLLRPNHTAACWSLGGATTTLYYPAVGTAFELLVAGGNLTCGLVSANFSLLCWSRDGLVAAEVNLPPILPGVCVSDNSSCKCGPLPDSGRFCKVSGDVICRRFCDTSPPPPPPSPRTPSPPATPSSRRGVSKGWIAFAVVGAVGCFAGLCSIVYCLLFGFCSHKKVHNSVQPN…	Oryza sativa Japonica Group	615	615	94	47	0	CCR3	1e-139
XP_002298311.2	hypothetical protein POPTR_0001s25940g	787	MTVKLSYLPTILFVAITPSLLHVVVVKSLGTASTIAITYSTPTACGIIAGEPTQRVQCYQNGQAISLQPNISFEAISGGLNFLCGLRSGGLAILCWETAAISHFSSLQPKRIYYSNTVRLTDLTVGDVQVCAREVNSGMVKCWRGVGRGKSSFPSPGVALKFSTITSGSGFTCGILMNNSRVHCWGNSDVGTEIERQFGNLTMLNLVAGESHACGLASSGVLVCKGSNGSGQLDAPFNSTFEFSALALGANFTCSIEQRNGLVKCWGEANKFQLDSYISENDSLDLIVAGLNFICGLTTRNLSMICWGMGWSNALSHGDDLPLGTIIPGSCVQSSCSTCGMYPNSETLCGGSGSICKSCQIERPLALPLPPITPPPSEELQPVLQVKSRNKISLVFLIV…	Populus trichocarpa	738	738	95	52	0	CCR3	0
XP_002312158.2	hypothetical protein POPTR_0008s06860g	674	MTKLHLSSAVLSVTTLSLLSFILSSPFLTHALGSGSTLAVISATSTVCGVAASQPSQSITCYRRTPIAEIITVQPNVSFSAISGGSTFFCGLRSGGYAFLCWDTTNSFFESRRVYVNNTALLQNLSVGDNQLALGASHSCAIRRNNGSVVCWGGGGSNFSCGLVSRDFSIMCWGPGWPNASGTRLPLGEVLPGPCVQSSCSECGLYPRSEKLCSGSGNICKPCGPNASILTPLAPTSLPSAPPPSIVPKSSPSNKLTTGLLAFAIVGSVGGFAGICTIIYCLWTGVCFGKKKVHNSVQPTITRAVSIAGVTSNNSGLNSRSSTIRRQSSRVMRRQRSGTSSKHGDRAEEFSLAELAAATNNFSVENKIGAGSFGVVYGGKLKDGREVAIKRGETGQKMK…	Populus trichocarpa	734	858	94	61	0	CCR3	1e-178
M1CPS5	Uncharacterized protein	673	MGGDKICGITNSTKNVTCWRGDLSEQPNGSSQFISISSGSEFSCGVLESSNRVVCWGNSDIASTIQSEFRNETMMNIYAGGRHACGVNATGFLICRGDNTNGQLDVPSNLSYEYFGLALGINHTCGIRRVNRTVVCWGGNGVFSSNVTEGYFFESVSAGLDFTCGLTTNNFSVVCWGPGWTSKMVPQGAALPLPMILPGPCVRSNCSCGIYPQSQSLCFGNGNICRPCDFSILAPPTSLLPPPAPPPLAPSSPSKRLSRGLLAFAIVGSVGTLAGICSIIYFLWAGGCFGKKKVHNSVQPTITATSNGGQLSSSGPISRSSTLRRQGSRLMRRQRSGTSSKHADRAEEFLFTDLAAATNNFSLENKIGAGSFGVVYKGKLPDGREVAIKRGETGTRTKK…	Solanum tuberosum	781	853	95	64	0	CCR3	0
XP_006338843.1	PREDICTED: putative serine/threonine-protein kinase-like protein CCR3-like	789	MTTPSAAVAVVLTLVNLFIYVQALGGSATTLAVVYGGSATICGIVANQPIQTIQCWKDNQSTATPISPNVSFDFIAGGLDGFTAVRSGGFSLLFWNTSFVPKRLYFSNSNLLTTVTMGGDKICGITNSTKNVTCWRGDLSEQPNGSSQFISISSGSEFSCGVLESSNRVVCWGNSDIASTIQSEFRNETMMNIYAGGRHACGVNATGFLICRGDNTNGQLDVPSNLSYEYFGLALGINHTCGIRRVNRTVVCWGGNGVFSSNVTEGYFFESVSAGLDFTCGLTTNNFSVVCWGPGWTSKMVPQGAALPLPMILPGPCVRSNCSCGIYPQSQSLCFGNGNICRPCDFSILAPPTSLLPPPAPPPLAPSSPSKRLSRGLLAFAIVGSVGTLAGICSIIYFL…	Solanum tuberosum	850	850	98	60	0	CCR3	0
XP_006355747.1	PREDICTED: putative serine/threonine-protein kinase-like protein CCR3-like	794	MTLPISGAGAVIVAAVISLITSVLLPFSHALGSSATTLAVAYGANITICGIVASQPIQRIQCWSENQLAPIPISPNASFNSIAGGVNGFTGVETGGFSLLFWNSSFQPKRLFFSYSTLLTTVTMGDTQICGLTNGTQNVKCWRDDSNLAKQPNGSSQFMSISSGSGFSCGILKSSNRVICWGNNRDIASAIQSGFGNITVVNIFAGGKHACGMNSTGFLICKGDNENGQLDIPSNFAYEYNGLALGVNHTCGILRMNYTVVCWGGNGEFSMNLTKGLSFESIVAGLDFTCGLTSGNFSVICWGPGWSSNMYPSGTELPLPMILPGPCVQNVCDCGVYPQSKTLCSGNGNICRPCDFSVGVAPPPSPPVFIMVPSSPSKGLRKGLLAFVIVGSVGAIAGI…	Solanum tuberosum	885	885	96	59	0	CCR3	0
C5YZ52	Putative uncharacterized protein Sb09g002330	871	MTPLPLLLHLLLLLLLLAIALSLPAASAASTLAISASSTSPTVCGIEEYNGTVYCAALPSSTSSNSSSTNASSSAAAVAANIITFAELSAGRGFVCGLQAGGAALFCWPSTPAPQWDQLRRLYNGPDPLTDLAVGGDHVAAYEPSANASASDSGRVLWWRGGDRFPAPVEGGFRSLVSGDGFSCAVETNASAAVRCWGPQGSAVQAGLANATAAPYLAAGGGRACTVLASGAALCSGSDVGAAANASLPRDLFVYGLAVGDAHACALRPANHTPDCWSLGGPTTTVSEPALGISFQFLVAGGNFTCGVASMDFSVYCWSAGADAAPVPLPKIRPGVCVSNDSTCRCGIMSGSQQFCGGSGVICKALCEDSTPPPASPPLPPPPPAPSSSSRRVAKAWIA…	Sorghum bicolor	588	649	93	45	0	CCR3	1e-130
CBI15947.3	unnamed protein product	865	MLGPSQLVPNGPCTATQHHSHELSWLLQFTLVSLSVSSVFPNEEEKNRDILCRLIPIYLMRISPSSVTIAFIFVALLSSPALPVNALGSSSTIAVSYATGTVCGILAGHPLQEIQCYRQGHIINLQPQVSYEAISGGQSFFCGLRSGGFSLLCWDTTFSNASFRPKRIYYSDRVGLTDLTVGNAQVCALEASSGGVKCWRGERGGSMFPTPEVGSEFQKITSGGGFTCGILKNNSRVLCWGVSTVGAEIQRQFGDLSMSSLVAGNSHACGLTDTGILVCKGNNDTGQLGFPSGSAFEFSGLALGANHTCAIQRRNGMVECWGGGTKLSEFGSQHIKNVSFESIVAGLDFTCGLTSRNLSVICWGPGWTGKRTSGSVFPLEMIIPGPCVEASCSVCGMYP…	Vitis vinifera	824	824	96	56	0	CCR3	0
F6HCC3	Putative uncharacterized protein	790	MTPLSVAVAAVVTVVIAAVSSPALVHGLGSGSTLAVSYGSGAVCGVVAGERYQRIECYRGGETISIEPNISSFSSISGGRDFFCGLRSGGFALFCWNTSFVAKRIYFNYTVLLENLAVGDDQVCATVNGTGVVKCWRGENSSSLSESSQFSSISSGLGFSCGILVNNRTVQCWGSNTIANQIQQEFGNTPMLSIMAGGSHVCGLNTTGYLLCEGSNDSGQLNVPSGSAYEFSNLSLGENHSCAIRQSNGSVVCWGGGGEFSTNATNGISFESIVSGLNFTCGLITTNYSIICWGPGWPSSSVSGLGLSPLPLSIILPGPCVQSSSCECVYPGSQYLCYGSEVVCKPCRVLVPGSPVPLSPVSPPSVSPPSSPSRALSRGLLAFAIVGSVGAFSGICTII…	Vitis vinifera	905	905	96	64	0	CCR3	0
XP_002272022.1	PREDICTED: putative serine/threonine-protein kinase-like protein CCR3-like	790	MTPLSVAVAAVVTVVIAAVSSPALVHGLGSGSTLAVSYGSGAVCGVVAGERYQRIECYRGGETISIEPNISSFSSISGGRDFFCGLRSGGFALFCWNTSFVAKRIYFNYTVLLENLAVGDDQVCATVNGTGVVKCWRGENSSSLSESSQFSSISSGLGFSCGILVNNRTVQCWGSNTIANQIQQEFGNTPMLSIMAGGSHVCGLNTTGYLLCEGSNDSGQLNVPSGSAYEFSNLSLGENHSCAIRQSNGSVVCWGGGGEFSTNATNGISFESIVSGLNFTCGLITTNYSIICWGPGWPSSSVSGLGLSPLPLSIILPGPCVQSSSCECVYPGSQYLCYGSEVVCKPCRVLVPGSPVPLSPVSPPSVSPPSSPSRALSRGLLAFAIVGSVGAFSGICTII…	Vitis vinifera	905	905	96	64	0	CCR3	0
XP_003632178.1	PREDICTED: putative serine/threonine-protein kinase-like protein CCR3-like	806	MRISPSSVTIAFIFVALLSSPALPVNALGSSSTIAVSYATGTVCGILAGHPLQEIQCYRQGHIINLQPQVSYEAISGGQSFFCGLRSGGFSLLCWDTTFSNASFRPKRIYYSDRVGLTDLTVGNAQVCALEASSGGVKCWRGERGGSMFPTPEVGSEFQKITSGGGFTCGILKNNSRVLCWGVSTVGAEIQRQFGDLSMSSLVAGNSHACGLTDTGILVCKGNNDTGQLGFPSGSAFEFSGLALGANHTCAIQRRNGMVECWGGGTKLSEFGSQHIKNVSFESIVAGLDFTCGLTSRNLSVICWGPGWTGKRTSGSVFPLEMIIPGPCVEASCSVCGMYPNSEVLCDGSGNICKSCEFDLPIPLPLPILPPQPSEDLQPNSPASPAPNRLLLAFLIVGS…	Vitis vinifera	826	826	96	56	0	CCR3	0
AFW74728.1	putative CRINKLY4-like receptor protein kinase family protein	840	MTPRPRLLLLLLPLLQPLALLLAIAVPAACAASTLAVSASSASPTVCGVAELSGTVHCAALQGASISNASSGPVAPSAIAFAELSAGRGFVCGLQAGGAALFCWPSTPAPRWGQLRRLYDGPAPLADLAAGADHVAAYDASGSGSGTVLWWRGGGRFPARADGAFRSLVSGDGFSCAVEASAPAAVRCWGPRGGALQAGLANASAAPCLAAGGDRACAVLASGTALCSGAPAANASAAAPPGDLFGYGLAVGDSHACALRRPYHTAVCWSLGGPTTTLYEPALGISFEFLVAGGNFTCGVASSDFSVYCWSVGAVAAPVPLPRIRPGVCVADDTACRGCGFMPQSQQFCGGSGGICDALCDGSPPLPPAPPPPPPRTPPPSSSRRVSKAWIAFCVVGAA…	Zea mays	596	596	88	45	0	CCR3	1e-135
AFW82748.1	putative CRINKLY4-like receptor protein kinase family protein	814	MTPRPRLLLLLLAIALPAASAASTLAVSASSTSPTVCGVAEPNGTVYCAPLQGPSSSNSASPVAPSAIAFAELSAGRGFVCGLQAGGAALFCWPSTPAPQWGQLRRLYNGPAPLADLAVGGGHVAAYDASGKVVLWWRGGGRFPARADGAFRSLVSGDGFSCAVQANASAAVRCWGPQGSAVQAGLANASAAPYLAAGGARACAVLASGAALCSGSDASAGALPRDLFGYGLAVGDSHACALRRPDHTAVCWTLGGPTTTLYEPALGISFAFLVAGGNFTCGVASSDFSVYCWSAGAVAAPVPLPRIRPGVCVSDDSSCRGCGFMSQSQKFCGGSGGICDALCDDSPPPPAPAPPSPPPSSSRRVSKAWIAFCVVGAVGGFAGLCSIVYCLVFGFCSNK…	Zea mays	604	604	88	47	0	CCR3	1e-134
NP_001174196.1	Os05g0127300	710	MTPLLLLLLLPLLLLAPASASTVAIAAGPTACAVAEGNSTVYCASATNSSSSAAVAPFVSFSQVSGGGGAFVCGLQVGGRALFCWPAAAPGQLRRVYNGPGQLSQLAVGGGHVAAYDAAARVIRWWRGGDRFPLWFGGGFASLVSGDDFTCAVETSTSAVRCWGPRGGAVEAGFLNASVSALAAGGSRACGVRRNDGGVLCSGGGVLAPREDLYVDGLAVGDSHACGLLRPNHTAACWSLGGATTTLYYPAVGTAFELLVAGGNLTCGLVSANFSLLCWSRDGLVAAEVNLPPILPGVCVSDNSSCKCGPLPDSGRFCKVSGGAAAAVGSGAPSPYGSPNGSLGRLRRQLSRVMTRQRSGPSSFKDPAEEFTFAQLAAATKDFAAEAKIGEGSFGTVYR…	Oryza sativa Japonica Group	446	588	81	66	6e-149	CCR3	1e-114
DAA37692.1	TPA: putative CRINKLY4-like receptor protein kinase family protein	806	MSPPPPRRHLLSLLALVAFFPPFLLASSSFPLPTIAIAAVSANTSASPHNLACALVPFGNGTDYMISCASVSNRSAEPHIYSYGGAGGGSTPFSAVVAGDGYLCSAGPTVSPPMAMRWWDLTDSEEPSKRVYWGKALSAVSGGGEYVCGLVEERIQCWRWSSGTFPQSLRFSAVAAGGGFVCGLAKDSGEVKCFGGREAVGREPKGSHAMLAAGERHACAVKAGSGEVVCWGEAAAVAAASPTVAGRSVSSLAVGDAITCVLWGNWTVACWPPEEAAPPQPVAQQQFVALEARGKVVCGVLMSDYSLVCWGPGVSGGVSKVFDRVLPGPCAPWTSCTCGVWSGSAPLCGGGTGYAAVCYPCGYSPQLMVLTPPTSDSSASSHSRWTKRRPSDLAIALIS…	Zea mays	397	494	93	36	5e-129	CCR3	6e-67
W5FJ17	Uncharacterized protein	1015	MMYLSIYEEDYIILKDDLVKQWIAEGFIHATEEEDMEEISRICFGELISRRLIQPVHISDNNDVLSCTVHHMVLDFIKHKSFEENFVTAIDNCQTTAPLVDKVRRLSLHFGNAEATPPTNMRLSQVRTLAFFGVIKCLPSIVEFGLLQVLILHLWGDDENICVDLTGISELFRLRYLHVTCNATLELPQTQRRGLQYLETLKIDAKVSAVPSDIVHLPGLLHLSLPVETNLPNGIGRMASLCTLGYFDLSVNSIDNVQSLIELANLRDLRLTCSTVHSSYLKSKMDIMGTILAKLSNLRSVTLKPSGILDRGSSSMSISCDGLSSVSSPPALLERFEWLPCICTFSTIPKWIGHLNKLCILKIGVRELTSSDVDVLRRLPALTVLSLYVRAKPAGRIVF…	Triticum aestivum	390	390	41	60	3e-124	CCR3	1e-103
XP_003552841.1	PREDICTED: putative serine/threonine-protein kinase-like protein CCR3-like	451	MVNSGASPVHSFASAVDNAMGSIDGDLGAFHVHGFASAVNNAMISTSGSLGALPVYDFASAVNNAMSSTSGSLGALPVYGFASAVNNAMISTSGSLGALPEHGFASAVNDAMSSTSGSLGALPVHGFSSAVDNAIRSRSRADLGRSSSPVHGFAMEDVCGSFRLAELVAATNNFSRDNMISHGRIGFVYKGKLFDGREVAIKRAGTSTSNIKEFQSITLGPLFLTNCLHHKHLVRLLGLCEEKSERLLVYQYMKNRALYDHLHDKNNVEKGSTMLNSWKMRIKISLDASRGIEYIHNHLYSIHGNIKSSNILLDATWTAKVSDFGKVSAGTRHVLTEKSDVCGFGVVLLELLTGKKPILKNEEDGSTRLHVIDFAEPAILAGELVKIKDPRVGPPGVNE…	Glycine max	326	326	39	55	2e-106	CCR3	1e-82
XP_003552842.2	PREDICTED: putative serine/threonine-protein kinase-like protein CCR3-like	491	MVSVYIWPQSTYILSLNESNQMDYEIAESTDKADITVDARSFSWAVDSAIKSETASILGESRIHSFCSVVDNAIRSRTASDLGTSPSPVHSLASAVANAMSSSSAAPFSQLETSPSPVQSLASAVPSAMSRSKAAPFSQLEVVPNATRHVPARLFTWAELKAATNNFSPHNRIRHFGTFGFGYRGKLVDGREVAIVKGTQFGKSEFAIFSRLDHRNLVGLVGYCENRDERLSVYEYMKNGLLRDCLHDKNNVDKDSSVLNSWKMRIKIAWDASLGIQYLHNYANPSIIHRDIKSSNILLDASWTARVFDFELSFICPEPDDEYDEIIMGTMGYMCPEYMTRGVLTAKCDVYGLGVVLLELLTGKRAILLESEEDGPPFYLVDFAVPPILAGDLVEILDS…	Glycine max	314	314	39	56	2e-101	CCR3	7e-83
XP_003537489.1	PREDICTED: putative serine/threonine-protein kinase-like protein CCR3-like	389	MANQMDSEIESVNMIDITVDAPSFVSKVDSAIRSESETWSNLGASRLHSFASVVDWAIRSSRTVSNLGTSPVPSFASAEDNNVMRAVPARLFTWAELVAATNNFSIHNQIGAGCFSVVYRGKLVDGREVAIKTGGTWPKRESKLTLLSGLHHKNLIGLVGFCETNYERLSVYEYMKNGSLYDRLHDKGSSVLNSWKMRIKIALDASRGIEYLHNYADSFIIHGDIKSSNILLDATWTARVSDFGWKFMRNRRRIIENTDPEYVIRGALSAESDVHGLGVVLFELLTGKRPTFVYGEDGGTLLSRKHLVDFAVTAISNGFLEKILDQRAGQPDVNEAEAVKLVADTAIRCVNLKLKDRPTMADIVVRLERALAICEYDSIFRGTIYDVSE	Glycine max	305	305	41	52	1e-99	CCR3	4e-76
XP_003538469.2	PREDICTED: putative serine/threonine-protein kinase-like protein CCR3-like	514	MTYVLSASAKANKMDTEMVESIDVTDDARSFSWAVDSAIRSETGSIFGESRVRSFDSLVDSAIRSSSATEEDLGSSPVHVFAMAEDRAMRSSSGADLGTFPFHVFATAADMRTIAARLTKAVSNAKRHFAEGLFTRAELIPVTQAELEPATNNFPGLLFTLAELKAATNNFSSDNMIDFYVYRGKLVDGREVAIKKRIATRGDSFGKSEFAIFSRLHHRNLVGLVGFCKNRNERLLVYEYMKNGSLHDHLHDKNNVEKASSVLNSWIMRIKIALDASRGIQYLHSYAVPSIIIHIDIKPSNILLDATWTARVFNFDLSFMNRESDCDDVHTEPVARTVGYICPEYLGVVTTKCDVYGLGVVLLELLTGKTAFFKSEEDGGPALYVVEFAVRAILAGDLV…	Glycine max	302	321	38	57	1e-96	CCR3	5e-79
XP_006589963.1	PREDICTED: putative serine/threonine-protein kinase-like protein CCR3-like	547	MFSPPAVGRNNNGFSSSYSGKVEQEPPTNDSSTHHGHGRHHHDEELDLELRLGNNNWNFFVEDVDEEKEKEEKKKKKIKEVSHECSLVNKHKPIWMRKPEEMTKEEYSAIMNNSSISLIRSNYLQIDGGYPRASNLFDTKPKGSKCNLLECDRQVTNRVGTEAKTRLVNATENSDLERRKPKKLASKVDSAIRSESETWSNLGASRLHSFAFVVDWAIRSSRTVSNLGTSPVPSFASAEDNNVMRAVPARLFTWAELVAATNNFSIHNQIGAGCFSVVYRGKLVDGREVAIKMGGTWPKRESKLTLLSSLHHKNLIGLVGFCETNYERLSVYEYMKNGSLYDRLHDKGSSVLNSWKMRIKIALDASRGIEYLHNYADSFIIHGDIKSSNILLDATWTAR…	Glycine max	298	298	38	52	2e-94	CCR3	3e-67
BAJ94547.1	predicted protein	530	AHYQVAAMAVWTGLGQAATLAQLVGADVGGLISMIVQAALTARQNRSECEQLARRVLMIAQLLPHVEEPEAAQPLAGLGDTLRDAHELVVSCQGRSTAYQIIMAGRTAERFREVQSKIDSYLILFPLISHIGITRRLERIYNFLVTEDSKRVEPSPHPKLQESAEVLHELLLQRTKEFRFAEIVAATNNFAPDTVIGHGSSGTVYRGRLDDGREVAIKRFNKYDYSVEDFNTELDILSRLRHKHIICFIGSCVTVSKYKRLLVTQQKKKKGLLTWWRKEPEEPTEPDDRLIVYEYMENGTLSDHLHPPDVGASTMSPVTVSWKMRIEVLLAVSRAIEHLHCHANPPIIHRDVKSTNILFDANWVPRLSDFGFSVALHMELMSTSFVIGSTGYLDPEYYH…	Hordeum vulgare subsp. vulgare	241	241	39	40	4e-74	CCR3	3e-59
BAJ97098.1	predicted protein	570	DATSPPHSRGRLVAAAGEPERRVVGSREVSGQQGAEDRRSHPFSLSLAVAMALWTGLGQAATVAQLVGADVGGLISMIVQAAMTARQNRSECEQLARRVLMIAQLLPHVQEPEAAQPLAGLGDTLRDAHELVVSCQGRSAAYQFVMAGRTAERFREVQGKIDSYLILFPVISHIGITRRLERIYNVLVPEDSTRDQLPHPLSQSSQLQESTEVVQEVLPQGIKEFTLTEIIAATKNFIHDTMIGHGSQGRVYRGRLHDGREVAIKRISENIKLEEFRMELDVLARLQHKYIIRLLGWCVSIKGKRMLTRRRKVLERLIVYEYMENGTLFDHLHPNQADSSALSPVTMSWKMRTDVLHRVSQAIEYLHCHSNPPIIHRDIKSSNILFDVSWVPHVSDFGL…	Hordeum vulgare subsp. vulgare	241	241	39	43	1e-73	CCR3	4e-58
CBI39288.3	unnamed protein product	688	MAKKQHFLKAFYYHFHCSTTRVSSMASPSKFLLLLTLSCLTCLPFISSLSSVSISETSNQTLICALLESSRLNCTSFPTGIQIPSVNRSFSGIVAGDGFQCVLSFPSATIMLCYRFSANGTNMHSKRLYYNDSALTEVAAGNTHVCGLVNGTNILHCWQWRGFNTSVQSDFSGIAVGEGFVCGLSSSGRITCIGTNSSSSSTIRDRVPSGSFQKVAAGFRHACAIYRNQSLVCWGETVGEEPQGEFVSLALGENRSCAMRGNGTVVCWGENGFSLPESLRETVFMTIEAKRSVFCGVDQYNFSLLCWGNEIFDSNSMVFPKVLPGSCTSSECPNGVVPGSGSMCGRGHICNAYQNRTLVEGPSQPPSPPPEVRNRSGWNDKMVAFLVVGCVGSASFLAV…	Vitis vinifera	225	357	82	32	5e-67	CCR3	7e-54
CBI25475.3	unnamed protein product	418	MTPLSVAVAAVVTVVIAAVSSPALVHGLGSGSTLAVSYGSGAVCGVVAGERYQRIECYRGGETISIEPNISSFSSISGGRDFFCGLRSGGFALFCWNTSFVAKRIYFNYTVLLENLAVGDDQVCATVNGTGVVKCWRGENSSSLSESSQFSSISSGLGFSCGILVNNRTVQCWGSNTIANQIQQEFGNTPMLSIMAGGSHVCGLNTTGYLLCEGSNDSGQLNVPSGSAYEFSNLSLGENHSCAIRQSNGSKIHNSTKKLVGFCQEMDERLLVYEYMKNGALYDHLHDKNNIEKSSNVLNSWNDVYGLGVVLLELLTGKRAIFKDGENGGTPISVVDFAVPAIIAGELMKVLDPRVGPPQTNEAEAVELVAYTAMHCVNLEGKERPTMADIVANLERALA…	Vitis vinifera	209	472	56	52	9e-64	CCR3	3e-51
EAY96398.1	hypothetical protein OsI_18295	751	MTPLLLLLLLPLLLAPASASTVAIAAGPTACAVAEGNSTVYCASATNSSSSAAVAPFVSFSQVSGGGGAFVCGLQVGGRALFCWPAAAPGQLRRVYNGPGQLSQLAVGGGHVAAYDTAARVIRWWRGGDRFPLWFGGGFASLVSGDDFTCAVETSTSAVRCWGPRGGAVEAGFLNASVSALAAGGSRACGVRRNDGGVLCSGGGVLAPREDLYVDGLAVGDSHACGLLRPNHTAACWSIGGATTTLYYPAVGTAFELLVAGGNLTCGLVSANFSLLCWSRDGLVAAEVNLPPILPGVCVSDNSSCKCGPLPDSGRFCKVSGDVICRRFCDTSPPPPPPSPPTRRCTTLSSPTSPATTTAAAAAAPAAAVGSGAPSPYGSPNGSLGRLRRQLSRVMTRQR…	Oryza sativa Indica Group	140	140	39	30	1e-38	CCR3	1e-113
Q9FIJ6	ACCR4_ARATH| Serine/threonine-protein kinase-like protein CCR4	751	MALTISISCFSSYFVSLLLLVLSSFSFVCFSLSTVSISHISNQTLVCALNNHSYLQCSSFPLNSIPFSLTGNLRNRRFSGVVSGNGFVCGLISRLDSNTSTLLCWRFSVDGTNMLHKRIYHGPELEELEAGNFRICGVERVSRRLRCWQPYYLPRPDNYRSIALGDNFFCGLSQPPGMISCEGIAKVPSGDHYIAIAAGSRQACAITVDNDVECWGQTQSLPREKFLALAVGEDRGCGVRWSNGTVVCWGNNNNFSLPQTLKDIHFTSIYAKGPMFCGVATRNYTLICWGNENFKSGVFTPFQGLISQVVMPGPCRRECPYRPLSGSQSLCGNELMICDLKRNDGEFPDTRAQNSKNKTWSRRNIAFLVVGCVGTFSLLLVISFLIFKSHCRCRVHDSG…	Arabidopsis thaliana	-	-	-	-	0	CCR4	0
XP_004138544.1	PREDICTED: serine/threonine-protein kinase-like protein CCR4-like	752	MDSFPFFSFIFQIFPFLFLSVSSLQTLSISETANQTLICSLNARFSLNCSSFPSGIQIPFNPNDSYSGIVAGDGFFCGLRNFPTTSNSIVVCWRFSVNGTNMETKRVYDGPNLKELRAGNSHICGVVNATNQLECWQWRRFDRNFTFDFSSIAVGSDFICGLSNPGVIRCEGTGNSTVAVDGGGRYTAVTAGFRHVCAINLRNELECWGMGVGERPAGEFKMLALGDDRSCGLRLNGTAVCWGEKNFTLPERLKGEFFTVIEAKKNVFCGSLRGNFSLLCWGNEILDRNLLPIFDFVSPGPCRSQCPCGPFPYTQQFCTPPTMICKPCENRAQFPPPPPPSSPPPEISHHSSGQRWSGGMVALLVVGCVGSLSLVLICSFFVYKYCKNRVCRVHDSGPM…	Cucumis sativus	727	727	98	53	0	CCR4	0
XP_004171513.1	PREDICTED: LOW QUALITY PROTEIN: serine/threonine-protein kinase-like protein CCR4-like	767	MDSFPFFSFIFHIFPFLFLSVSSLQTLSISETANQTLICSLNARFSLNCSSFPSGIQIPFNPNDSYSGIVAGDGFFCGLRNFPTTSNSIVVCWRFSVNGTNMETKRVYDGPNLKELRAGNSHICGVVNATNQLECWQWRRFDRNFTFDFSSIAVGSDFICGLSNAGVIRCEGSGNSTVAVDGGGRYTAVTAGFRHVCAINLRNELECWGMGVGERPAGEFKMLALGDDRSCGLRLNGTAVCWGEKNFTLPERLKGEFFTVIEAKKNXFCGSLRGNFSLLCWGNEILDRNLLPIFDFVSPGPCRSQCPCGPFPYTQQFCTPPTMICKPCENRAQFPPPPPPSSPPPEISHHSSGQRWSGGMVALLVVGCVGSLSLVLICSFFVYKYCKNRVCRVHDSGPM…	Cucumis sativus	718	718	98	52	0	CCR4	0
NP_001235105.1	cytokinin-regulated kinase precursor	769	MAPFLINHLFVFLFCLRAINTLSTTVSISETSNSNQTLICVLQHPNQQGQSNLNCTSFPQAQAITLDVNPNVSYSQIVGGNGFVCALGPLSSSISVMGCWRFSANATYNVPYKRIYRGPIVEDIDSGNSHVCGLVRKGNKNNSLELECWQWHGFNSSMSMPMSSVAVGENFVCGLSERGDVNCRERGRGNGSRVRVVVDAPAPGGNYSYIAAGFRHACVISGDGSLHCWGDMEEGQKPPQAGSFISLALGEKRSCALGDDRRVVCWGSNNFSMPRRLQDTYFESIVAKRTVFCGVLSSDYSLLCWGSKIFESNNKVFDDVLPGPCRNECPCGPQSNSAKLCNSPGGVICQPCSPRVVQSPSPPSNQSGGWSSQMVAFLVVGCVGCSSLLLVTAFFLNRY…	Glycine max	659	659	95	49	0	CCR4	0
XP_003605634.1	Serine/threonine protein kinase-like protein CCR4	746	MAFHHKHLFISLYFFLSFILLPIINTLSTVSISHTSNSNQTLICVLQSQNQQKHSNLNCTSFSPSISFGTKLELNSNVSYSQIVGGNDIDSGNSHVCGLVKGNNGFRLECWQWRGFNSSSGMNMNMSNIAVGENFVCGLLENGKGNVVTCKGSNNRVVGNEPKNGGNYSVIEAGSNHVCAISNDGGLDCWGDMVGEKPKGRFISLALGENRSCALGYDGIVTCWGLNNFTLPLTLKNTFFESIVAKKSVFVVFCLLIILCFVGAMKFLSQKKVFDNVLPGPCKNQCPCGPLSDSAKLCVSPAIICKPCSPSFEIPTLPPSNPPSQMPENPSKSGTWSNKNVAFLVVGCVGCTSLLLVLSFFLYKYCKGTACKSSRVHDSGRLDDLDRENESQPRANHAV…	Medicago truncatula	589	589	98	47	0	CCR4	1e-172
XP_002325962.1	hypothetical protein POPTR_0019s10710g	765	MACCFFNQPLLHLFFYFILFSSFIPFVFPLSTVSISETSNQTLVCALVHVPGATQSVLNCLSFPSGIQIPFNSNTSFSAIVSGDGFLCGLISLSPATSTLVCWRFSVNGTNMYYKRIYQDLALSQLEAGNSVTCGLVNDTNRLECWPRRKFKTSSVGQNFSSMAVGEDFVCGLLESGNITCLGSNNAVVRQQPKGNYSTIAAGSTHACAIKFNGELDCWGSMAGEKPPQGGFISMALGENRGCALRTNETVVCWGQGNFSLPERLRETYFSTIEAKRKVFCGVLKSNFSLYCWGNENFNPNSIVFKDVLPGPCRSSCGLDRIIEGSGRLCPEGQQICSHSKSNIHNSVPPAVAPPPPPTLENNQERCCSRCKWSGKMIAFLVVGCVGSLILLLVVGFFL…	Populus trichocarpa	745	745	97	54	0	CCR4	0
XP_006376137.1	hypothetical protein POPTR_0013s10130g	768	MACDLFNLHLFSYLIFLSSFIPFVFSLSTVSISEVSNQTLVCALTPARDTKQHSFLNCSSFPGGIQIPSNPSTSFSAIVGGEGFLCGLISLPRSPTINGTNMSYKRVYHDLALSQLEAGKSFACGLINVTNRLECWPRRKFNSSSIAQGLSSIAVGEDFVCGISESGSITCGGSINNAFACLKEKYCAIAAGFRHACAINSHHGIECWGSMAGEKPEGEFISMALGENRGCALRTDATIVCWGQDNFSLPERLKETCFIAIEAKINVFCGVERSNWSLYCWGNEIFNSNLLVFEKVLPGPRRNDCPDAILERSGGSCPQCQNIFPHSKSNSNCTPPPAVPPPTPEPRQERRRRCNKWSDKIIAFFVVGCGGSLVLLLVIGFFLFKYCKCRGCRIHDSGR…	Populus trichocarpa	675	675	97	50	0	CCR4	1e-180
M1B3D3	Uncharacterized protein	686	MVCWRFSNNGTDLNYRRVYIGPLLTNLDSGNSHVCGIVNGTNRLQCWQWHGFSLSNNSSITSNLAVGEDFVCGLLPSGQIQCLGSFRNVIDAVPSGNYSEIAAGSQYACAISMNGSLACWGNMVVEKPVDQFKSLALGDTRGCGLRVNGKVVCWGENGFSLPSTLSEISFETLEAKQDIFCGIVTSNYSLFCWGNEIFNSNPVVFEEAVPGPCTTSCPCAPLGNYAKFCGQELMICEHCVWPGFGQNPPIVNGSGPSPPPLSPQPTPTPMPMPTPSQWNTRNVAFLVVGCVGSLMMLSVVVIMFLKYCKIRGCRVHDSGRLDEVGTPPQQGSQASQVQDQLGPQPSILEKRPSIFHSMGNGGHLEEFSLQVLLQVTNNFSEEHKIGTGSFGSVYHATLD…	Solanum tuberosum	647	647	86	50	0	CCR4	1e-180
XP_006350343.1	PREDICTED: serine/threonine-protein kinase-like protein CCR4-like	782	MAILVQKTHFLFSLIFIFSLSFQPISSLSTIAISKTSNQTLVCALISSSSYPQESSLNCTSFPQGIQIPLNPSVSFTGIVGGNGSLCGLTSSSNSIMVCWRFSNNGTDLNYRRVYIGPLLTNLDSGNSHVCGIVNGTNRLQCWQWHGFSLSNNSSITSNLAVGEDFVCGLLPSGQIQCLGSFRNVIDAVPSGNYSEIAAGSQYACAISMNGSLACWGNMVVEKPVDQFKSLALGDTRGCGLRVNGKVVCWGENGFSLPSTLSEISFETLEAKQDIFCGIVTSNYSLFCWGNEIFNSNPVVFEEAVPGPCTTSCPCAPLGNYAKFCGQELMICEHCVWPGFGQNPPIVNGSGPSPPPLSPQPTPTPMPMPTPSQWNTRNVAFLVVGCVGSLMMLSVVVIM…	Solanum tuberosum	692	692	98	49	0	CCR4	0
CAN70665.1	hypothetical protein VITISV_029649	764	MASPSKFLLLLTLSCLTCLPFISSLSSVSISETSNQTLICALLESSRLNCTSFPTGIQIPSVNRSFSGIVAGDGFQCVLSFPSATIMLCYRFSANGTNMHSKRLYYNDSALTEVAAGNTHVCGLVNGTNILHCWQWRGFNTSVQSDFSGIAVGEGFVCGLSSSGRITCIGTNSSSSSTIRDRVPSGSFQKVAAGFRHACAIYRNQSLVCWGETVGEEPQGEFVSLALGENRSCAMRGNGTVVCWGENGFSLPESLRETVFMTIEAKRSVFCGVDQYNFSLLCWGNEIFDSNSMVFPKVLPGSCTSSECPNGVVPGSGSMCGRGHICNAYQNRTLVEGPSQPPSPPPEVRNRSGWNDKMVAFLVVGCVGSASFLAVICFFLFRYCKGRGCSKVHDSGRLD…	Vitis vinifera	629	629	88	51	0	CCR4	1e-180
XP_002280064.2	PREDICTED: serine/threonine-protein kinase-like protein CCR4-like	773	MASPSKFLLLLTLSCLTCLPFISSLSSVSISETSNQTLICALLESSRLNCTSFPTGIQIPSVNRSFSGIVAGDGFQCVLSFPSATIMLCYRFSANGTNMHSKRLYYNDSALTEVAAGNTHVCGLVNGTNILHCWQWRGFNTSVQSDFSGIAVGEGFVCGLSSSGRITCIGTNSSSSSTIRDRVPSGSFQKVAAGFRHACAIYRNQSLVCWGETVGEEPQGEFVSLALGENRSCAMRGNGTVVCWGENGFSLPESLRETVFMTIEAKRSVFCGVDQYNFSLLCWGNEIFDSNSMVFPKVLPGSCTSSECPNGVVPGSGSMCGRGHICNAYQNRTLVEGPSQPPSPPPEVRNRSGWNDKMVAFLVVGCVGSASFLAVICFFLFRYCKGRGCSKVHDSGRLD…	Vitis vinifera	666	666	92	51	0	CCR4	0
NP_001176433.1	Os11g0222000	811	MPPSRRHGHGGARLLVFLLPVLLLLRTAASNTLSTFAMAKAESTTIVCALLPSAASPLLVDLNCTEAGGDHERQETYPSSHPFSALAGGDHFLCAVGPSALRAGDVAMRWWDLSKNRTNTPETNGTKDGGGRSKRVYLGPPIQALSSGGYRVCGVLSSGELHCWRWRGLKIPDGLRFVSVAVGDWFVCAIQAARPASIRCFGNDTEAVSSAPEGGSFDVVAAHGRRACALSTSGALSCWGHGAPLVGGGEDEATTGYAALALGTDGVCGLRTNGTIRCFGDGVAPPPDSLAGFQYVDVQAHGSVFCGVLMANYSLVCWGGHEFNATNRLVFDRVLPGPCVTMSSCRCGVLPGSANLCASGRCICVDCAFELNVATPNASSLGPGPGKSSSKRSRIIWVA…	Oryza sativa Japonica Group	457	457	92	39	1e-152	CCR4	3e-89
A2ZCR2	Putative uncharacterized protein	811	MPPPRRHGHGGARLLVFLLPVLLFLRTAASNTLSTFAMAKAESTTIVCALLPSAASPLLVDLNCTEAGGDHERQETYPSSHPFSALAGGDHFLCAVGPSALRAGDVAMRWWDLSKNRTNTPETNGTKDGGGRSKRVYLGPPIQALSSGGYRVCGVLSSGELHCWRWRGLKIPDGLRFVSVAVGDWFVCAIQAARPASIRCFGNDTEAVSSAPEGGSFDVVAAHGRRACALSTSGALSCWGHGAPLVGGGEDEATTGYAALALGTDGVCGLRTNSTIRCFGDGVAPPPDSLAGFQYVDVQAHGSVFCGVLMANYSLVCWGGHEFNATNRLVFDRVLPGPCVTMSSCRCGVLPGSANLCASGRCICVDCAFELNVATPNASSLGPGPGKSSSKRSRIIWVA…	Oryza sativa Indica Group	454	454	92	39	3e-151	CCR4	6e-89
EAY80396.1	hypothetical protein OsI_35574	811	MPPPRRHGHGGARLLVFLLPVLLFLRTAASNTLSTFAMAKAESTTIVCALLPSAASPLLVDLNCTEAGGDHERQETYPSSHPFSALAGGDHFLCAVGPSALRAGDVAMRWWDLSKNRTNTPETNGTKDGGGRSKRVYLGPPIQALSSGGYRVCGVLSSGELHCWRWRGLKIPDGLRFVSVAVGDWFVCAIQAARPASIRCFGNDTEAVSSAPEGGSFDVVAAHGRRACALSTSGALSCWGHGAPLVGGGEDEATTGYAALALGTDGVCGLRTNSTIRCFGDGVAPPPDSLAGFQYVDVQAHGSVFCGVLMANYSLVCWGGHEFNATNRLVFDRVLPGPCVTMSSCRCGVLPGSANLCASGRCICVDCAFELNVATPNASSLGPGPGKSSSKRSRIIWVA…	Oryza sativa Indica Group	454	454	92	39	3e-151	CCR4	6e-89
AFW60708.1	putative CRINKLY4-like receptor protein kinase family protein	789	MPPPRRLHLHAAFLLLPIFLLATWRPAAASALSTFALAKADATTIVCALLPSAASPLLVDLNCTAAGGDHARQETYPSSHPFNALAGGEDFLCAVGPSGERAGDVDMRWWDLSGDGSNRSKRVYMGPPLRALSSSEYRVCGVLHSGELHCWRWRGLRISRDLRFVAAAVGDGFVCAILKGTPASIRCFGNDTAAPAVAGAPTNGSFDVVAACAHRACALSTAGALTCWGRDPPRVGPGDAAATGYAALALGEDGVCGLRTNFTIRCFGDGVAHPPPDLAHAQFLDVRAHGKAFCGVLMANYSLVCWGGPEFNTTNRLVFGRVMPGPCLPMSSCQCGVLPGSANFCDDSRCVCVDCAFELNVARPNASVVPGKGGWSRRTMWIAIAAAAAVFLVFFVAFQ…	Zea mays	447	447	95	39	5e-149	CCR4	1e-122
NP_001052870.1	Os04g0439600	822	MSPPHLLLLLLALLLSPPLLLASSSFPLPTIAIAAVSNSSSNPSKQHLACGLVPAAGGAAAGYRISCASVSNRSAAAPHVYAYGGDGTCSPYSAVVAGDGYLCSAAPTSSPPMSMRWWDLNEAGDGSKRVYRGRVLSAVSGGGESVCGLVGERMQCWRCPWGEGAPARVGFSAVAVGGGFVCGLVVGSGEVRCYGGGEVVGREPAGRRFMLLAAGERHACGVDDGGVVGCWGEAAAVAAASPPRISRAVSTVAVGDAVTCVLWGNWTVSCWPEGEASPPPALAGQQFVALEAKGKVVCGVLMSDYSLQCWGAGVAGGVRKVFDKVLPGPCAPSKSCSCGVWSGSAQLCAGSGGGGGGDVSVCYPCGYTPPPMALSPTSNSSSSSSSQSKGKRRPSNLAI…	Oryza sativa Japonica Group	441	441	94	39	3e-146	CCR4	5e-87
BAJ94969.1	predicted protein	793	MMRPPRGILLFLAMLVALLLVRPGAASTLATFAMAKAEETTIVCGLLPSAASPALFDLNCTAAGGDHERQETYPSTHPFSALAGGEDFLCAVGPSSARAGAVDMRWWDLSKNAGRSKRVYLGPPLRALASSGYRVCGVLSSGELHCWRWRGLAIPAGLRFVAVAVGKGFVCGIVDGQDAPIRCFGNKTEDIEAVRAAPQGGSYDVVVACGRHACALSMGGGLSCWGSGAPALDGENVTAGYAALALGESGVCGLRTNGTIRCFGHGVAAPPEPLAGLQYIDVQAQGCAFCGVLLANYSLVCWGGHEFNATNRLVFDRVLPGPCVPMSSCQCGVLPGSANLCAGGRCICVDCAFELNVAFPKAANPGEASSSSSRRRRKIIIGVAVGAAALLVLVVALQF…	Hordeum vulgare subsp. vulgare	434	434	95	39	6e-144	CCR4	1e-121
BAJ94647.1	predicted protein	854	MLMSPRRLGLAINTAPLLLLLVAVSAGAAAPPPSPRQFSTVAISNTANSTLVCALIIDRVNEDGGGNSKLQCKSMPDGRVTSYPSADIPFNAIAAGRDFLCGLMAPVGGHAAMRWWSFSEEEEARRSRPIGRRIYWGTSLRAMSAGGPHVCGLSDDHEPTCWEWPGLSLPKGLDFSLIALGQDFLCGIVKGNDTAMTCYGGGMLQPPPFKGDGLAAPFQRVAAGRRHACAVDKLGGLVCWGDGNPTVRADQLPADMMAMALGRNTTCILAGNGTVRCWGVKVPEEYTHTTFVSIEADGDTVCAVMTINYSVVCWGNDGRFDGRHLVYNDTMPGACTPKSNCSCNILPDSGRLCGTGGGLAGEELAVCSPCSQALNASRIVVSNGNTAQLGDDGGDGKKN…	Hordeum vulgare subsp. vulgare	429	429	93	37	2e-141	CCR4	1e-107
C5Y1N4	Putative uncharacterized protein Sb05g008500	806	MPPPRRLHLHLHAAFFLFLLPAFFLLLATRGSGAAASALSTFALAKADATTIVCALLPSAASPLLVDLNCTAAGGDHARQETYPSSHPFAALAGGEDFLCAVGPSGERAGDVDMRWWDLSGNGNGSRSKRVYMGPPLRALSSGGYRVCGVLDSGELHCWRWRGLNISRDLRFVDAAVGDGFVCGILKGTPASIRCFGNDTAAQAVKAAPEDGSFDVVAARGHRACALSTTGALTCWGRDPPRVDDAAGTGGYAALALGETGVCGLRTNFTIRCFGDGVAHPPPGLAHAQFLDVRAHGKAFCGVLMANYSLLCWGGAEFNATNRLVFGRVMPGPCVPMSSCQCGVLPGSANLCDEGRCVCVDCAFELNVARPNASVLPGNGGGRSRRTMWIAIAAAGAAF…	Sorghum bicolor	423	423	95	39	2e-139	CCR4	2e-79
W5AVJ2	Uncharacterized protein	595	MLLAAGDRHACAVDHRGMLGCWGEAAAVAAAAPPKLIRAVSTVAVGDALTCVLWGNWTVSCWPEEDAAVPPQIKQEQFVALEAKGKVVCGVLMSDYSLVCWGGDVAGGVRKVFDKVLPGPCAPARSCPCGVWSGSAMLCDSDGAAICYPCGYTPPMNAQAPTSNPWASTSHHMRKKRRPSDLVIAMISFGAGSGLVVLVAALLVAYCLRRRSRSRSSGSHDSGRIHAEPMTATAPRVPRRLSMLLSKGPNTTVEQFPLAALRAATDVFSPSHRIGSGSFGAVYRAALPDGREVAIKRAERRDSGASSSAAAAAARRVNHESAFVSELSLLSRLNHKNLVRLLGFCADGGEHILVYEFMHNGTLHDHLHKRPAPLSPPLASWPSRLRLALGAARGIEYLH…	Triticum aestivum	416	436	74	46	2e-139	CCR4	1e-104
NP_001060813.1	Os08g0109800	836	MPMSRHGALALTTSFLLAAVAVFLPGHAAARQFSTVAISNSPDATVVCALVRPKDVPDDVPGAKLRCTSMPTGEVMSYPSADVPYNAIAAGTDFLCGLMAPNGGHAAMRWWSFSDEAAANRSRPVGRRLYWGPSLRALSAGGPHVCGLSDAHDPTCWEWPGLSLPKGLDFSRIALGRDFLCGVVKGNASAMTCFGGGMAPPAFAGAASIVAVAAGHRHACAVDDDGGMSCWGEGYPDMRPGDLPADMKSMALGRNTTCILDGDDMVRCWGVEVPEEYRRASFVSIEADGDTVCGVLTTNFSVVCWGNERFHGRHLIFNDTMPGACATVGNCSSSCGFVPGSAALCGNGGGEGGEQLVVCQPCKLPLNASRLVVGNGTSKNAAAPTDSGKNRKAVKVAVT…	Oryza sativa Japonica Group	417	417	95	36	4e-137	CCR4	3e-77
W5EBM2	Uncharacterized protein	643	MRPPQLFLALLVVPLLLRPGAASTLSTFAMAKAKETTIVCGLLPSAASPALLDLNCTAAGGDHQRQETYPSTHPFSALAGGEDFLCAVGPSSARADAVDMRWWDLSKNASRSKRVYLGPPLRALASSGYRVCGVLSSGELHCWRWRGLAIPTGLRFVAVAVGKGFVCGIVAGPPTATPIRCFGNKTEDIEAVTAAPQGGSYDVVVACGQHACALSTGGGLSCWGRGAPALDGENATAGYAALALGETGVCGLRTNGTIRCFGDGVAAPPAPLAGLQYIDVQAQGGAFCGVLMANYSLVCWGGHEFNATNRLVFDRVLPGPCVPMSSCQCGVLPGSANLCAGGRCICVDCAFELNVAVPKAANPGKAGGGKRRKIIIWAAVAAAALLVLVVALQFALLLW…	Triticum aestivum	300	300	76	36	3e-136	CCR4	1e-76
EAZ05347.1	hypothetical protein OsI_27551	839	MPMSRHGALALTTSFLLAAVAVFLPGHAAARQFSTVAISNSPDATVVCALVRPKDVPDDVPGAKLRCTSMPTGEVMSYPSADVPYNAIAAGTDFLCGLMAPNGGHAAMRWWSFSDEAAANRSRPVGRRLYWGPSLRALSAGGPHVCGLSDAHDPTCWEWPGLSLPKGLDFSRIALGRDFLCGVVKGNASAMNCFGGGMAPPAFAGAASIVAVAAGHRHACAVDDDGGMSCWGEGYPDMRPGDLPADMKSMALGRNTTCILDGDDMVRCWGVEVPEEYRRASFVSIEADGDTVCGVLTTNFSVVCWGNERFHGRHLIFNDTMPGACATVGNCSSSCGFVPGSAALCGNGGGEGGEQLVVCQPCKLPLNASRLVVGNGTSKNAAAPTDSGKNRKAVKVAVT…	Oryza sativa Indica Group	414	414	99	35	7e-136	CCR4	4e-77
CAH66844.1	H0525C06.7	802	MSPPHLLLLLLALLLSPPLLLASSSFPLPTIAIAAVSNSSSNPSKQHLACGLVPAAGGAAAGYRISCASVSNRSAAAPHVYAYGGDGTCSPYSAVVAGDGYLCSAAPTSSPPMSMRWWDLNEAGDGSKRVYRGRVLSAVSGGGESVCGLVGERMQCWRCPWGEGAPARVGFSAVAGGGGEGARGRRFMLLAAGERHACGVDDGGVVGCWGEAAAVAAASPPRISRAVSTVAVGDAVTCVLWGNWTVSCWPEGEASPPPALAGQQFVSLEAKGKVVCGVLMSDYSLQCWGAGVAGGVRKVFDKVLPGPCAPSKSCSCGVWSGSAQLCAGSGGGGGGDVSVCYPCGYTPPPMALSPTSNSSSSSSSQSKGKRRPSNLAIALISAGAGSALVALLAALAAVY…	Oryza sativa Indica Group	410	410	94	38	1e-134	CCR4	3e-87
AFW61433.1	putative CRINKLY4-like receptor protein kinase family protein	858	MPMSSHAHAGHRRLFLLTSTSTSLAFVAAVLLLIVDACAASRQFSTVAISHAPNATLVCALVTSADDAGAGPPGSSKLRCTSLPDGQQFVYPSADIPYNAIAAGTDFLCGLMAPLGGHAAMRWWSFSEEFAANRSRPVGRRLYWGPSLRSLSAGGSHACGLSDDHGPSCWEWPRLALPKGLDFSRIALGHDFLCGIDKLDNTSMSCFGAMTAPSLAPAPAAFATIAAGHRHACAVDAEGGFGCWGDDDGDVPNVPAHELPADMLAMALGNGSTCILSGIGRVQCWGAVQVPDQYRNADFLAIEADGGAVCGILRSNYSVACWGRTDRFGTGGSLVYNSTMPGACTHKKSCPCDIISGSGALCGSGGSEGGEELAVCQACAVRLNASRLLITNGRERSAA…	Zea mays	410	410	96	36	7e-134	CCR4	2e-74
M0Y6Q1	Uncharacterized protein	522	MSRQQFVALEVKGKVVCGVLMSDYSLVCWGGGVAGGVRKVFDKVLPGPCAPARSCPCGVWSGSAALCDGGGAAICYPCGYTPPMNAQVPASNPWASTSHTRKKRRPSDLVIAMISFGAGSGLVVLVAALLVAYCLRRRSRSRSSGSHDSGRIHAEPMTAPGPRVPRRLSMLLSKGPNTTVEQFPLAALRAATDVFSPAHRIGSGSFGAVYRASLSDGREVAIKRAERRDSGASSSAAAAAARRVNHESAFISELSLLSRLNHKNLVRLLGFCADGGEHILVYEFMHNGTLHDHLHKRPAPLSPPLASWPSRLRLALGAARGIEYLHTYAVPPIIHRDIKSSNILLDASWSAKVSDFGLSLLKNLGTGDNAGDEEPCVTAGTVGYMDPEYYRLQHLTDKS…	Hordeum vulgare subsp. vulgare	387	387	62	48	3e-129	CCR4	4e-95
W5BGW7	Uncharacterized protein	504	MSDYSLVCWGGDVAGGVRKVFDKVLPGPCAPARSCPCGVWSGSAMLCGASGGAAICYPCGYTPPMNAQAPTSNPWASTSHTRKKRRPSDLVIAMISFGTGSGLVVLLGALLVAYCLRRRSRSRTSGSHDSGRIHAEPMTAPGPRVPRRLSMLLSKGPNTTVEQFPLAALRSATDVFSPSHRIGSGSFGAVYRASLPDGREVAIKRAERRDSGASSSAAAAAARRVNHESAFISELSLLSRLNHKNLVRLLGFCADGGEHILVYEFMHNGTLHDHLHKRPATLSPPLASWPSRLRLALGAARGIEYLHTYAVPPIIHRDIKSSNILLDASWSAKVSDFGLSLLKNLGTGDDNAGGEEPCVTAGTVGYMDPEYYRLQHLTDKSDVYSFGVLLLELLSGCKV…	Triticum aestivum	369	369	60	48	7e-123	CCR4	2e-95
NP_001169098.1	uncharacterized protein LOC100382942	505	MSDYSLVCWGPGVSGGVSKVFDRVLPGPCAPWTSCTCGVWSGSAPLCGGGTGYAAVCYPCGYSPQLMVLTPPTSDSSASSHSRWTKRRPSDLAIALISAGIGSGVLAAIAAVVAVYCLRRRRSGASQDPGRIHAEPIGPAPRVERRLSALLSKGPNTTVEQFPLVALRGATDGFSPSHRIGSGSFGVVYRACLPDGREVAIKRAERRGPVAESSSVAARRANNHEVAFVAELTLLSRVNHKNLVRLLGFCADGGERILVYEYMPNGTLHDHLHKRAAPLSPPLASWPARLRLALGAARGIEYMHTYAVPPIIHRDIKSPNILLDDAWTAKVSDFGLSLLINDLSSSGGGNGCNAAAADDEPCMTAGTVGYMDPEYYRLQHLTDKSDVYSFGVVLLELLS…	Zea mays	363	363	60	46	1e-120	CCR4	1e-85
EEE61054.1	hypothetical protein OsJ_14911	1195	MLLAAGERHACGVDDGGVVGCWGEAAAVAAASPPRISRAVSTVAVGDAVTCVLWGNWTVSCWPEGEASPPPALAGQQFVALEAKGKVVCGVLMSDYSLQCWGAGVAGGVRKVFDKVLPGPCAPSKSCSCGVWSGSAQLCAGSGGGGGGDVSVCYPCGYTPPPMALSPTSNSSSSSSSQSKGKRRPSNLAIALISAGAGSALVALLAALAAVYYLRRHRGSSSPVSGRIHAEPTGTAPRVERRLSALLSKGPNTTVEQFPLVALRAATDCFSPAKRIGSGSFGAVYRASLPDGREVAIKRAERRDTGGPSSSSAAAARRVDHEAAFVSELALLSRVNHKNLDHLHRRAASAAAPVSPPVASWPSRLRLALGAARGIEYMHTYAVPPIIHRDIKSSNILLD…	Oryza sativa Japonica Group	347	731	78	39	7e-108	CCR4	1e-73
DAA38905.1	TPA: putative CRINKLY4-like receptor protein kinase family protein	720	MPPPRRLHLDATFLFLPVFLFATWRPVAAAALSTFAMAKADTTTIVCALLPSAASPLLVDLNCTAAGGDHARQVTYPSSHPFAALAGGENFLCAVRPSGERAGDIDMRWWDLSGDGSSSSKRVYMGPPLRALSSGEYRVCGVLSSGELHCWRWRGLNISRDLRFAAAAVGDGFVCGILKGTPASIRCFGNDTAAAAVAGAPADGSFDVVAACGHRACALSTTGVLACWGHDPPTVAPDDAATGYAALALGEAGVCGLRTNSTIRCFGDGVAVPPAGLARAQFLDFNATNRLVFGRVLPGPCLPMSSCQCGVLPGSANLCDDGRCVCVDCAFELNVARPNASLVPVKGGRGRKTMWIAIAAGTTAFFVFFVALQFALVLRCRRRRRRRRNEQDTSGGAQQ…	Zea mays	332	332	95	33	4e-106	CCR4	5e-66
W5ESP7	Uncharacterized protein	766	MRPPRLFLALLVPLLLRPGAASTLATFAMAKAEETTIVCGLLPSAASPALLDLNCTAAGGDHQRQETYPSTHPFSALAGGEDFLCAVGPSSARADAVDMRWWDLSKNAGRSKRVYLGPPLRALASSGYRVCGVLSSGELHCWRWRGLAIPTGLRFVAVAVGKGFVCGIVAGPPTATPIRCFGNRTEDIEAVTAAPQGGSYDVVVACGLHACALSTGGGLSCWGSGAPALDGENATAGYAALALGETGVCGLRTNGTIRCFGEGVAAPPEPLAGLQYIDVQAQGGAFCGVLMANYSLVCWGGHEFNATNRLVFDRVLPGPCVPMSSCQCGVLPGSANLCAGGRCICVDCAFELNVAVPKAANPGKAGGGRRRKIIIWAAVAAAALLVLVVALQFALLLWC…	Triticum aestivum	311	311	82	35	1e-97	CCR4	8e-81
EAZ41271.1	hypothetical protein OsJ_25778	836	MPMSRHGALALTTSFLLAAVAVFLPGHAAARQFSTVAISNSPDATVVCALVRPKDVPDDVPGAKLRCTSMPTGEVMSYPSADVPYNAIAAGTDFLCGLMAPNGGHAAMRWWSFSDEAAANRSRPVGRRLYWGPSLRALSAGGPHVCGLSDAHDPTCWEWPGLSLPKGLDFSRIALGRDFLCGVVKGNASAMTCFGGGMAPPAFAGAASIVAVAAGHRHACAVDDDGGMSCWGEGYPDMRPGDLPADMKSMALGRNTTCILDGDDMVRCWGVEVPEEYRRASFVSIEADGDTVCGVLTTNFSVVCWGNERFHGRHLIFNDTMPGACATVGNCSSSCGFVPGSAALCGNGGGEGGEQLVVCQPCKLPLNASRLVVGNGTSKNAAAPTDSGKNRKAVKVAVT…	Oryza sativa Japonica Group	416	416	95	36	7e-95	CCR4	1e-76
AFW74271.1	putative CRINKLY4-like receptor protein kinase family protein	864	MPMSCHDHAAGHRRLFQLRTTTTTTRLFLSLLVAVLLVADVCSAARQFSTVAISHAPNATLVCALVTAAADDDAGSPGSKQLRCTSLPDGEQFVYPSADIPYNAIAAGTDFLCGLMAPLGGHAAMRWWSFTEEFAANRSRPVGRRLYWGPSLRSLSAGGSHVCGLSDDHDPTCWEWPHLDLPKGLDFSRIALGHDFLCGIDKLDNTSMSCYGAMAAPSLAPDPAPLRTVAAGHRHACAVDAEGGFACWGDGDGDVPEVPAHELPDDMLAMALGNGTTCILSGSGRVRCWGAVQVPDQYRTADFLAIEADGDAVCGILNSNYSVACWGRSDRFGAGGSLVYNSTMPGACARKKSCPCDIISGSGALCGTGGAEGGEELAVCRACATPLNASRILIANGRA…	Zea mays	301	438	80	51	2e-93	CCR4	4e-75
